# Supplementary material for: Salmonella Degrades the Host Glycocalyx Leading to Altered Infection and Glycan Remodeling
Source: PubMed Central journal article supplement (PMC4937416; doi:10.1038/srep29525), 2016-07-08
Supplement: srep29525-s1.pdf [file srep29525-s1.pdf]

***Salmonella* Degrades the Host Glycocalyx Leading to  
Altered Infection and Glycan Remodeling**

Narine Arabyan<sup>1</sup>, Dayoung Park<sup>2</sup>, Soraya Foutouhi<sup>1</sup>, Allison M. Weis<sup>1</sup>, Bihua C. Huang<sup>1</sup>, Cynthia C. Williams<sup>2</sup>,  
Prerak Desai<sup>1†</sup>, Jigna Shah<sup>1‡</sup>, Richard Jeannotte<sup>1‡,4</sup>, Nguyet Kong<sup>1</sup>, Carlito B. Lebrilla<sup>2,3</sup>, and Bart C. Weimer<sup>1\*</sup>

### Supplementary Figures

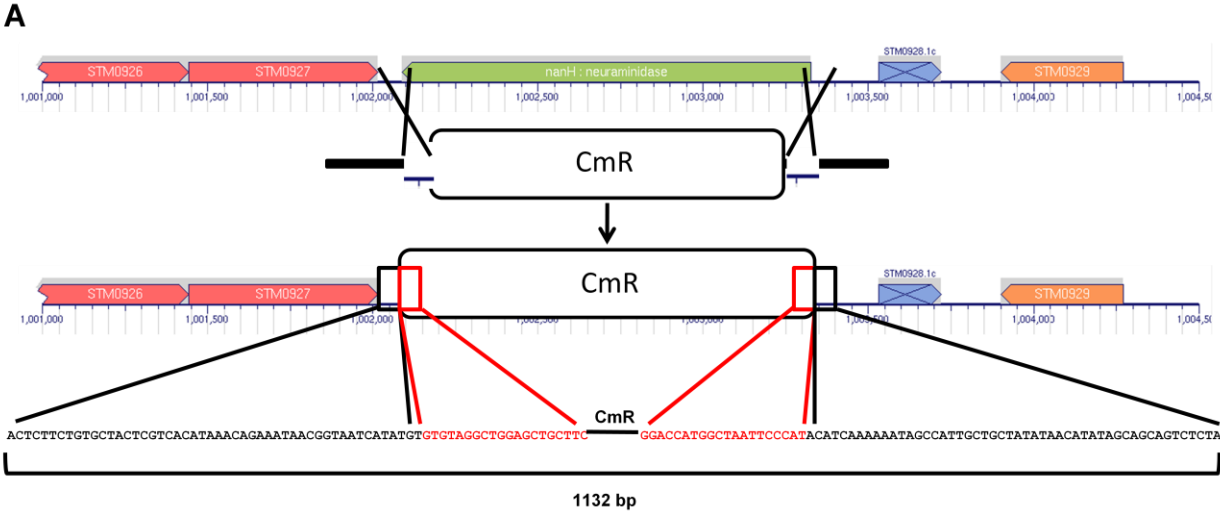

|               | WT Gene | WT Junction | KO Gene | KO Junction |
|---------------|---------|-------------|---------|-------------|
| <b>mela</b>   | +       | -           | -       | +           |
| <b>nanH</b>   | +       | -           | -       | +           |
| <b>CHPNeu</b> | +       | -           | -       | +           |
| <b>maIS</b>   | +       | -           | -       | +           |
| <b>glgX</b>   | +       | -           | -       | +           |

27

28

29

30

31

32

33

34

35

36

37

38

39

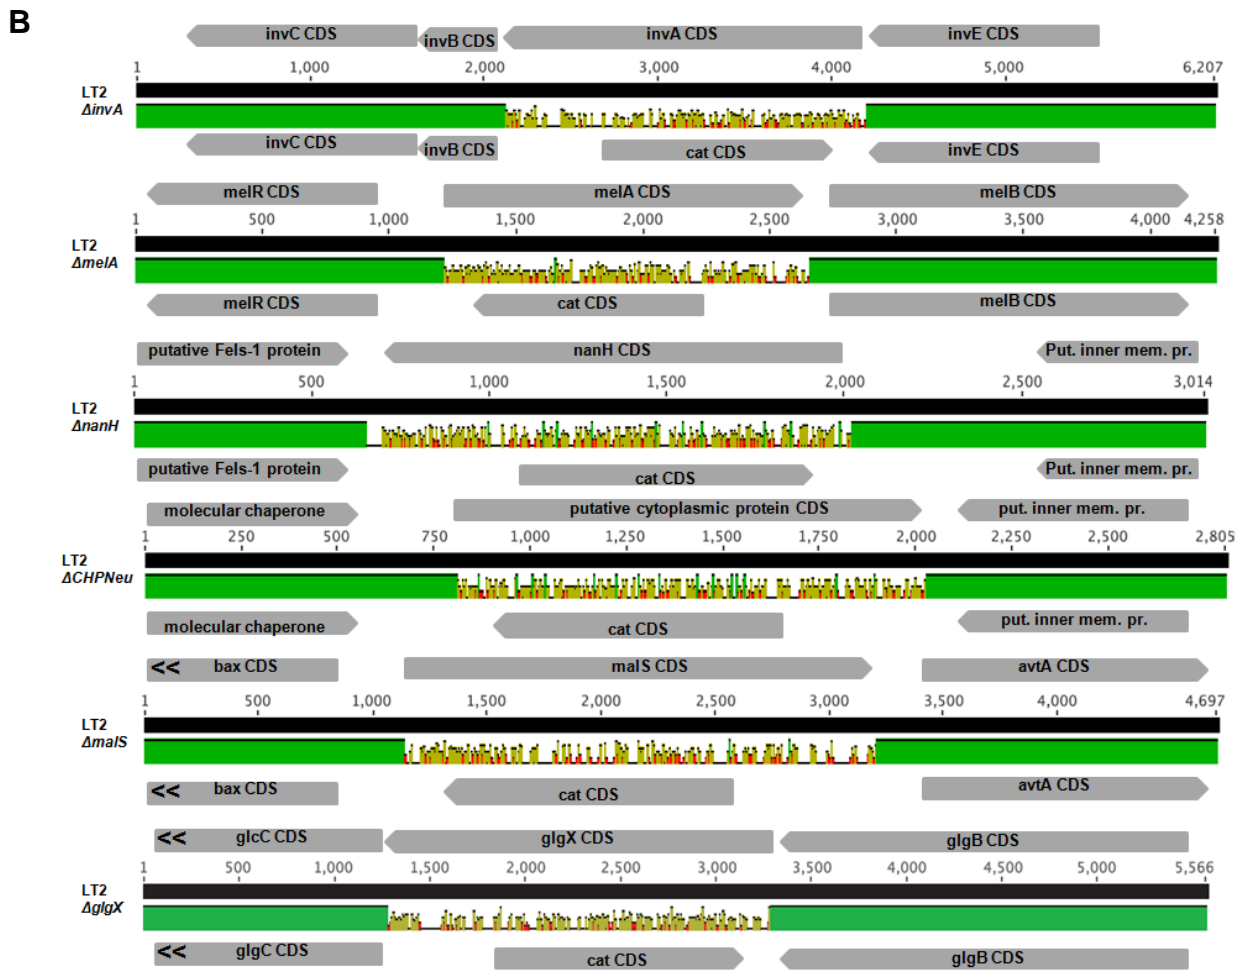

40

41

42

43

44

45

46

47

48

49

50

51

52

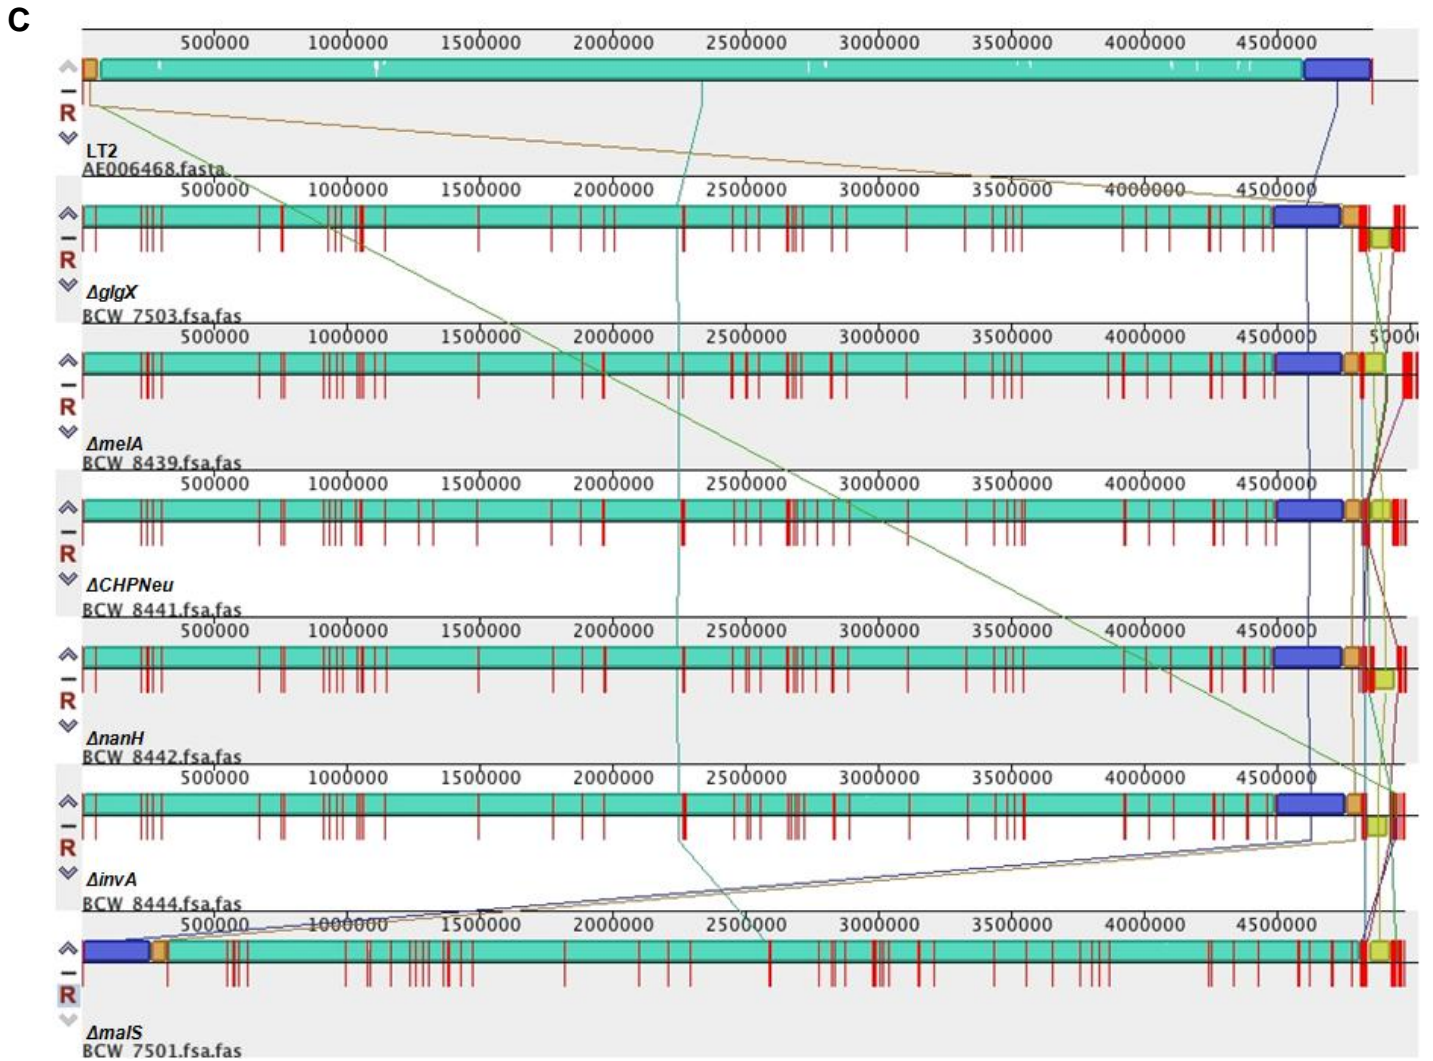

53

54 **Supplementary Figure S1. Generation of specific deletions in *Salmonella* LT2.** (A) The schematic of  
 55 targeted gene deletion. Here, *nanH* gene is depicted as an example. Two 70-mer primers amplify the region  
 56 containing the chloramphenicol resistance cassette (CmR) from plasmid pKD3. The resulting linear PCR  
 57 product has 50 bases at each end that are homologous to the sequence of *nanH*. Transformation of this PCR  
 58 product into *Salmonella* LT2 that expresses  $\lambda$ -Red recombinase leads to homologous recombination event  
 59 resulting in the exchange of the *nanH* with CmR. All mutant strains used in this study were generated in the  
 60 same way. PCR results of each deletion are summarized in the schematic. (B) Single gene analyses using  
 61 MUSCLE to determine deletion of target gene and insertion of *cat* (Chloramphenicol acetyltransferase). The  
 62 gene of interest and the neighboring area were extracted from each genome compared to the wild type to verify  
 63 the lack of rearrangement and the targeted double cross over replacement. In each comparison, the black track

64 represents the segment of interest in the wild type and green track represents the corresponding segment in the  
65 deletion strain. The absence of the gene of interest and the presence of the chloramphenicol resistance gene (*cat*  
66 CDS) in the knockout strain verified the targeted disruption. The gene (CDS) arrangement for each comparison  
67 is shown (gray bars). The upstream and downstream regions have 100% homology within the neighborhood.  
68 (C) Mauve visualisation of whole genome alignment and comparison. *Salmonella* Typhimurium LT2 was used  
69 as the reference genome (top track) and compared to each of the individual deletion genomes. This analysis  
70 showed genome block homology and gene neighborhood conservation. Reference based assembly also showed  
71 that only the gene of interest was replaced with the chloramphenicol resistance gene. Both analyses (de nove  
72 and reference based assemblies) found that these genomes were syntenic.

A

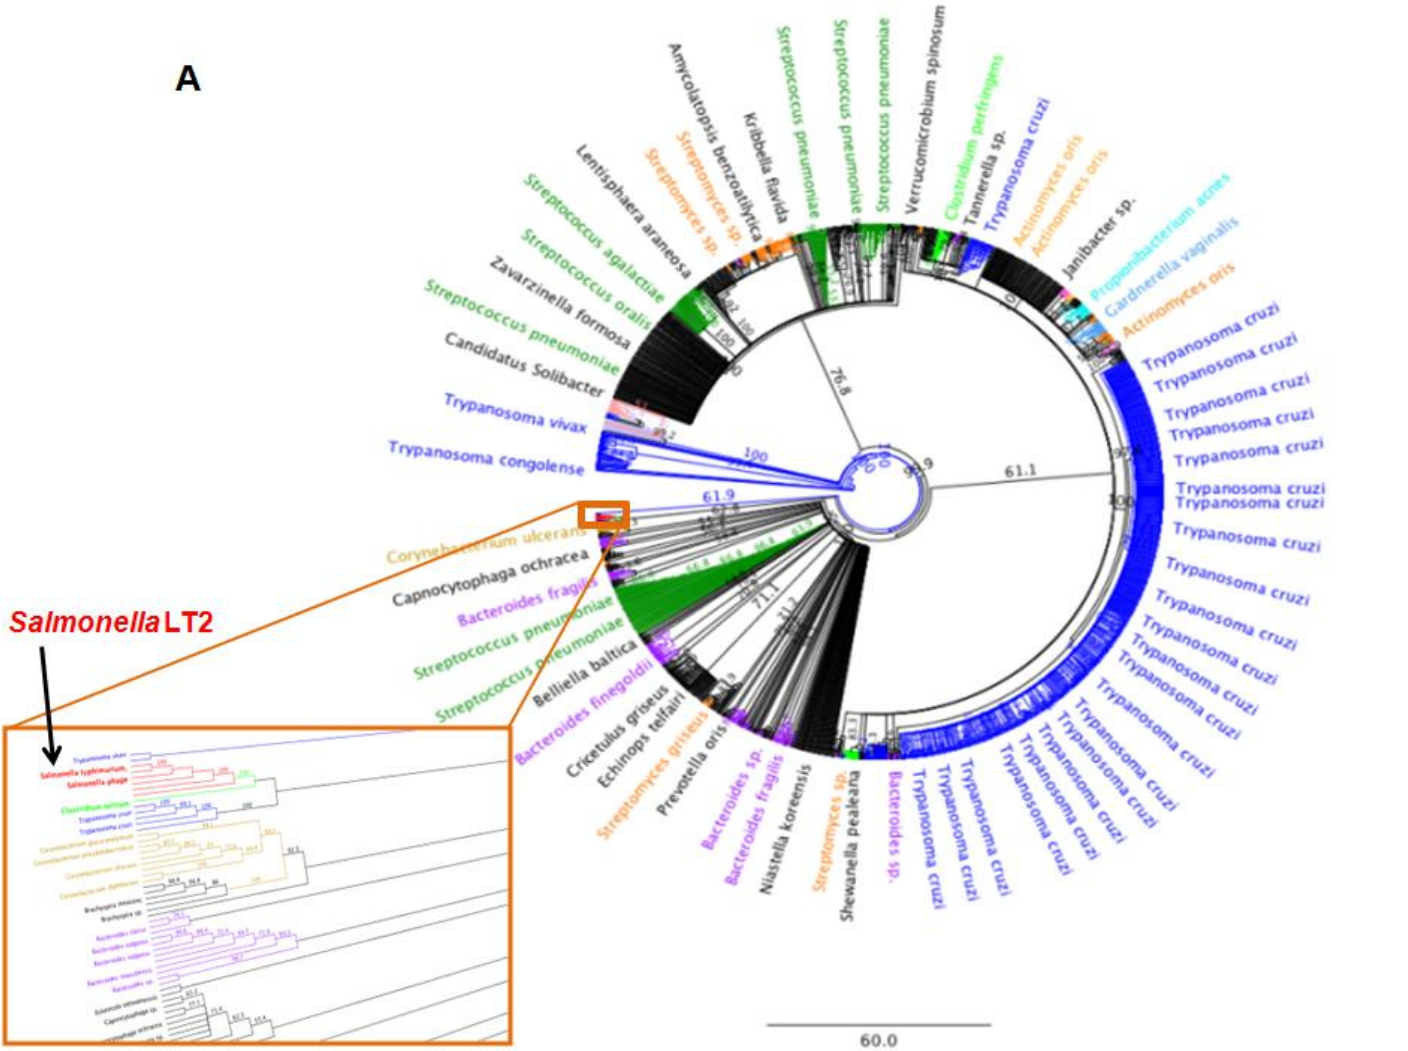

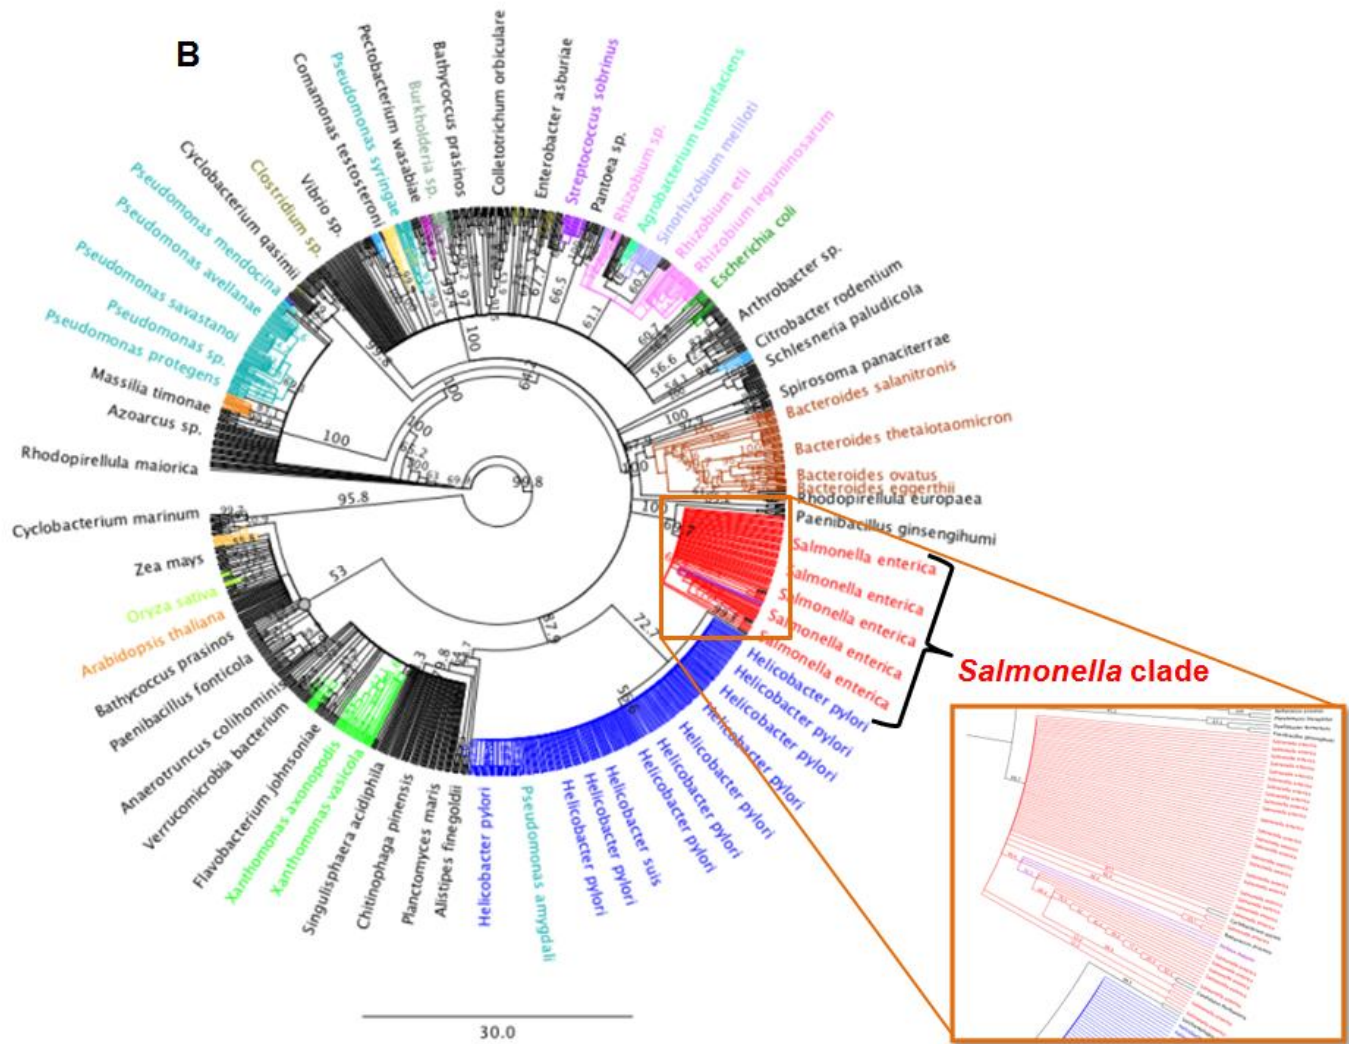

101

102

103

104

105

106

107

108

109

110

111

**Supplementary Figure S2. Diversity of sialidases in nature.** Phylogenetic trees of *nanH* (A) and *CHPNeu* (B). This study bioinformatically examined the sialidase diversity and genomic distribution among microbes. Phylogenetic trees were constructed using a Neighbor-Joining consensus tree with 1000 bootstrap replicates. This analysis revealed that members of the same genera (indicated with the same color) were found on different sialidase clades (*Escherichia coli*, *Klebsiella* spp., *Bacillus* spp., *Pseudomonas* spp., *Helicobacter* spp., *Bacteroides* spp., *Clostridium* spp., *Streptococcus* spp., *Salmonella* spp., *Rumonococcus* spp.), indicating widespread horizontal gene transfer (HGT). *CHPNeu* and *nanH* were widely distributed among pathogenic and commensal bacteria and parasites. *nanH* was most closely related to *Clostridium perfringens*, suggesting that *Salmonella* Typhimurium LT2 acquired this gene as a result of HGT. The direct impact of multiple sialidases remains to be explored. Each color represents different genera. Bootstrap values are listed on each branch.

112 Nodes represent speciation events. Branch length represents the degree of evolutionary changes over time. The  
113 scale bar at the bottom of each tree is nucleotide substitutions per site.

114

115

116

117

118

119

120

121

122

123

124

125

126

127

128

129

130

131

132

133

134

135

136

137



**A**

Conserved domains on STM0928 – *nanH*, sialidase

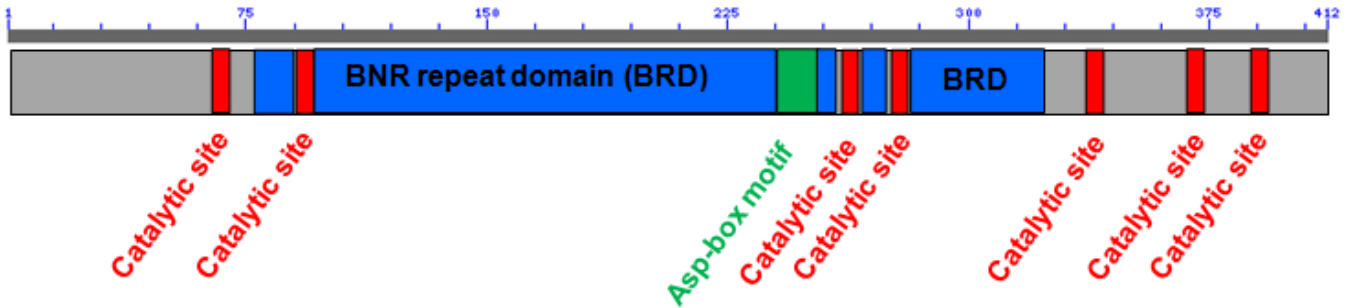

**B**

Conserved domains on STM1252 – *CHPNeu*, Conserved Hydrolase Predicted Neuraminidase (sialidase)

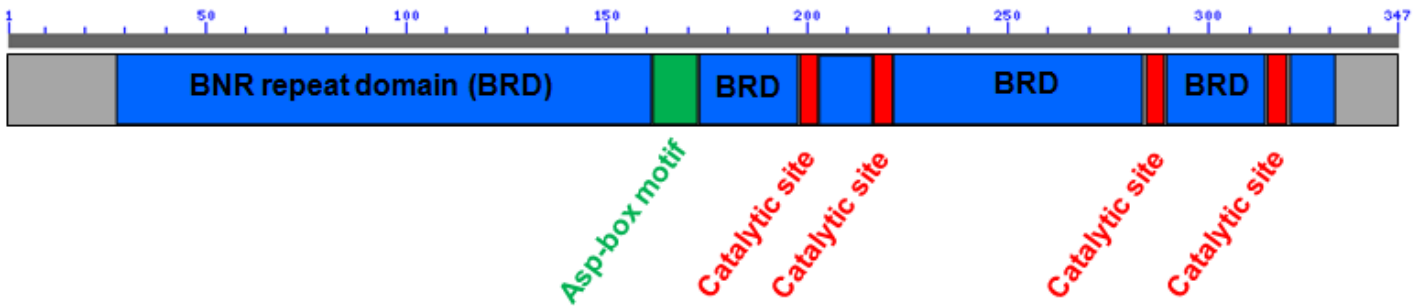

138

139 **Supplementary Figure S3. Comparison of sialidases *nanH* and *CHPNeu*.** The two sialidases from  
140 *Salmonella enterica* Typhimurium LT2 have the same domains and function as sialidases. The conserved  
141 regions in *nanH* (A) and *CHPNeu* (B) include an Asp-box motifs (with conserved residues: Ser/Thr-X-Asp-[X]-  
142 Gly-X-Thr- Trp/Phe) and a BNR repeat-like domain that suggests it may act as a sialidase, however they are  
143 structurally very different. While the function and domains of sialidases demonstrate homology; structural and  
144 domain organization demonstrate that these genes have undergone domain shuffling or may be orthologs.  
145 Domain shuffling is not a common event in proteins that are important for infection and are under strong  
146 diversifying selection pressures. This difference led to different invasion phenotypes during the *in vitro*  
147 infection of Caco-2 cells.

148

149

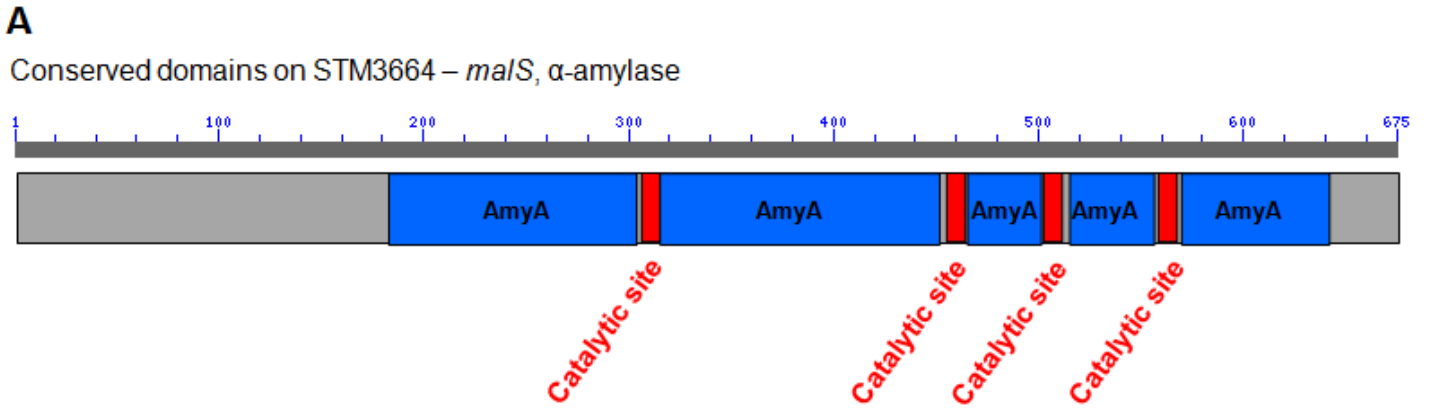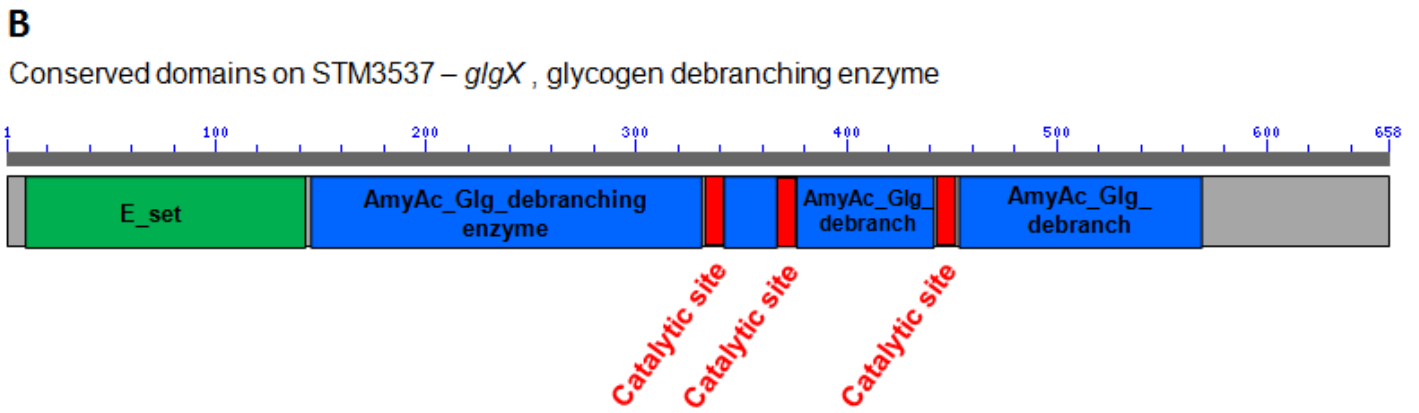

150  
151 **Supplementary Figure S4. Comparison of amylases *malS* and *glgX*.** The two amylase-like enzymes in  
152 *Salmonella* LT2 also showed opposite results. Both enzymes had similar domains, however, both had structural  
153 variations. (A) *malS* is composed of an  $\alpha$ -amylase domain and four catalytic sites. (B) The glycogen  
154 debranching enzyme, *glgX*, contains an  $\alpha$ -amylase catalytic domain. On N-terminal side, *glgX* has an E or early  
155 set domain that is associated with the catalytic domain of the Glycogen debranching enzyme and bacterial  
156 isoamylase.

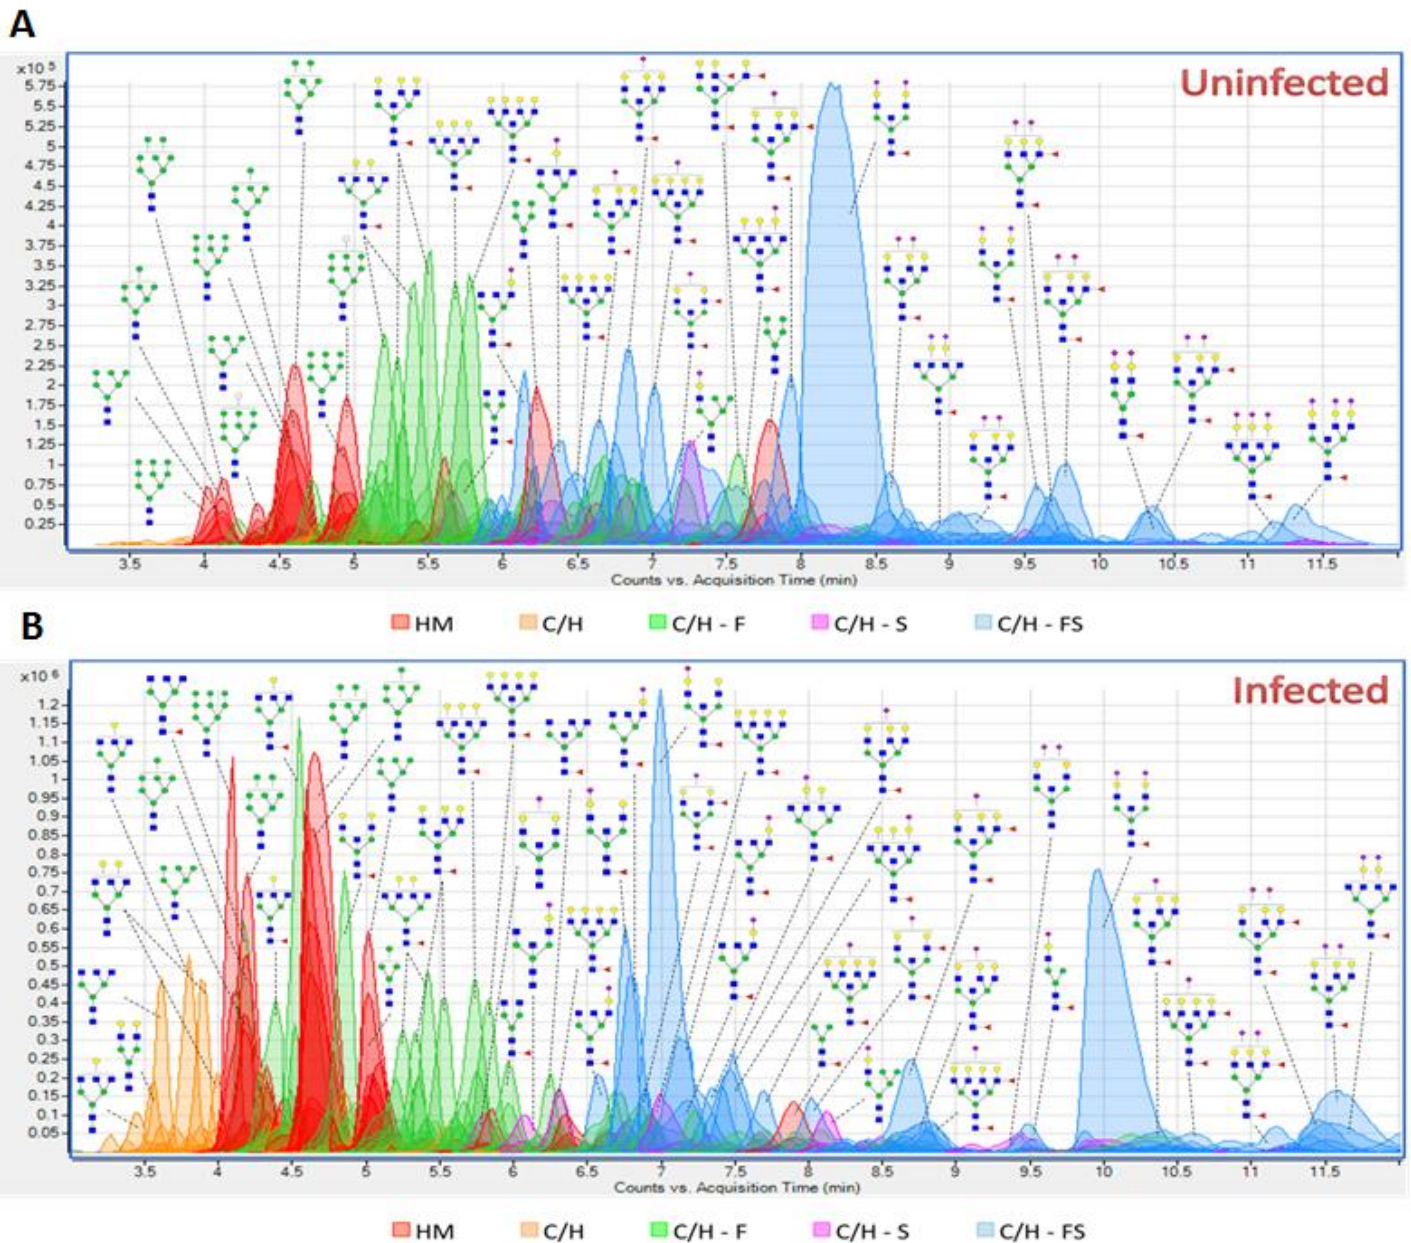

162

163 **Supplementary Figure S5. Glycan profiles.** (A) An extracted compound chromatogram of counts vs. retention  
 164 time is shown for uninfected Caco-2 cells. Each peak corresponds to a glycan which are colored distinguish  
 165 between high mannose, neutral (no decorations) complex/hybrid, fucosylated, sialylated, and both fucosylated  
 166 & sialylated glycans. (B) Glycan compositions found in Caco-2 after 1 hour of infection with *Salmonella* LT2.

167 Select glycan structures that change during the course of infection have been assigned with putative structures.

168

169

170

171

A

◆ Precursor  $m/z$  914.85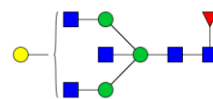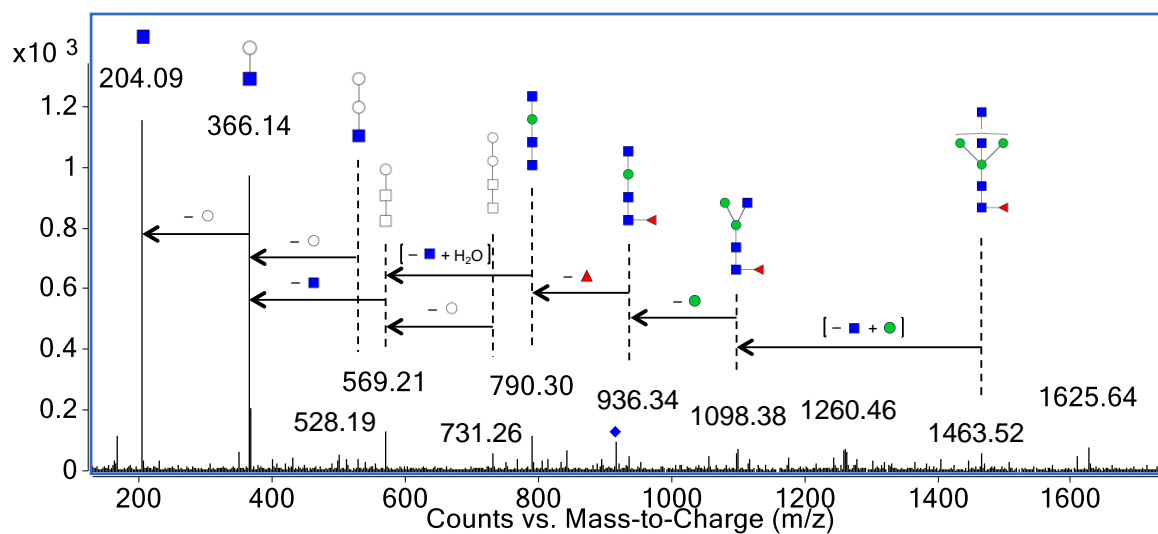

172

173

B

◆ Precursor  $m/z$  942.33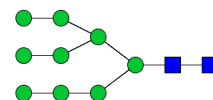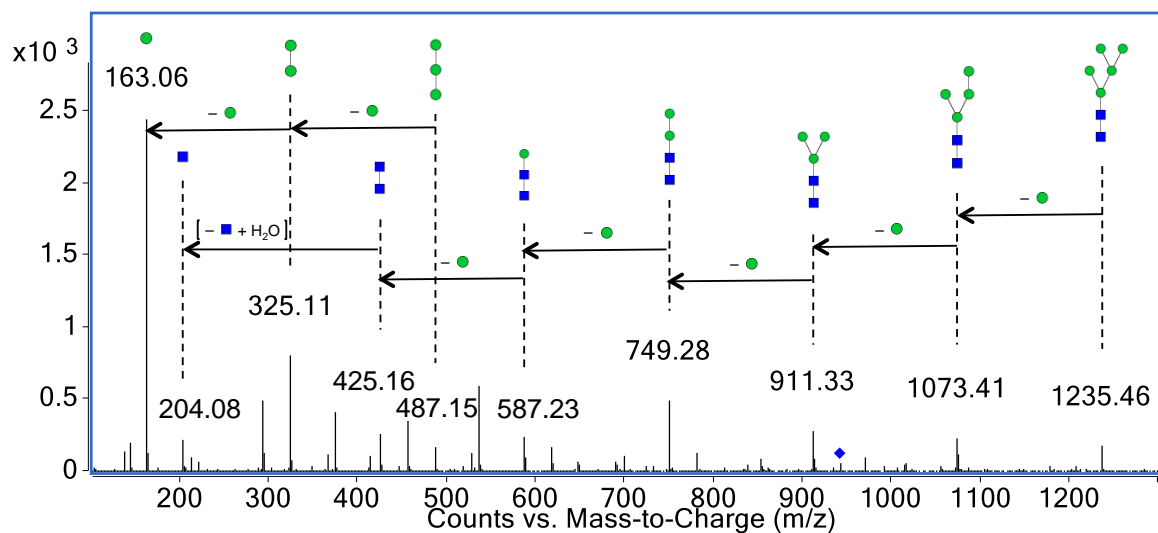

174

175 **Supplementary Figure S6. Representative MS/MS spectra of identified N-glycan structures. (A-B)**

176 Sequential fragment losses are annotated inset. Precursor ions are indicated by a blue diamond.

177

178

180 **Supplementary Table S1:** Gene expression intensity of *Salmonella* LT2 glycosyl hydrolases within 60 minutes  
 181 of infection of Caco-2 cells.

| Gene ID  | Gene        | Gene Name                                                 | Intensity of <i>Salmonella</i> WT | Intensity of Caco-2 + <i>Salmonella</i> WT |
|----------|-------------|-----------------------------------------------------------|-----------------------------------|--------------------------------------------|
| STM4298  | <i>mela</i> | alpha-galactosidase                                       | 4.490                             | 2.978                                      |
| STM1252  | STM1252     | putative cytoplasmic protein                              | 6.120                             | 5.658                                      |
| STM0928  | <i>nanH</i> | Neuraminidase                                             | 5.670                             | 4.769                                      |
| STM3664  | <i>malS</i> | periplasmic alpha-amylase precursor                       | 2.492                             | 2.632                                      |
| STM3537  | <i>glgX</i> | glycogen debranching enzyme                               | 3.629                             | 4.328                                      |
| STM2166  | <i>bglX</i> | periplasmic beta-D-glucoside glucohydrolase               | 3.991                             | 3.839                                      |
| STM1209  | <i>nagZ</i> | beta-hexosaminidase                                       | 4.401                             | 4.711                                      |
| STM1963  | <i>amyA</i> | cytoplasmic alpha-amylase                                 | 3.255                             | 3.581                                      |
| STM3663  | <i>bax</i>  | putative ATP-binding protein                              | 5.320                             | 5.934                                      |
| STM0260  | <i>dniR</i> | transcriptional regulator                                 | 3.356                             | 4.415                                      |
| STM1799  | <i>emtA</i> | membrane-bound lytic murein transglycosylase E            | 3.638                             | 4.719                                      |
| STM3617  | STM3617     | endo-1,4-D-glucanase                                      | 3.258                             | 3.674                                      |
| STM1242  | <i>envE</i> | putative envelope protein                                 | 5.760                             | 5.661                                      |
| STM1182  | <i>flgJ</i> | flagellar biosynthesis protein                            | 3.712                             | 4.266                                      |
| STM3538  | <i>glgB</i> | glycogen branching enzyme                                 | 4.049                             | 5.440                                      |
| STM3513  | <i>malQ</i> | 4-alpha-glucanotransferase                                | 3.982                             | 4.521                                      |
| STM0401  | <i>malZ</i> | maltodextrin glucosidase                                  | 4.225                             | 3.804                                      |
| STM2988  | <i>mltA</i> | membrane-bound lytic murein transglycosylase A            | 4.284                             | 4.345                                      |
| STM3112  | <i>mltC</i> | membrane-bound lytic murein transglycosylase C            | 3.136                             | 4.196                                      |
| STM0016  | STM0016     | hypothetical protein                                      | 2.984                             | 3.492                                      |
| STM0018  | STM0018     | putative exochitinase                                     | 4.148                             | 3.981                                      |
| STM0148  | STM0148     | putative cytoplasmic protein                              | 4.201                             | 3.573                                      |
| STM0233  | STM0233     | putative endochitinase                                    | 3.976                             | 3.319                                      |
| STM0907  | STM0907     | putative chitinase                                        | 4.920                             | 4.342                                      |
| STM1316  | <i>celF</i> | phospho-beta-glucosidase/cellobiose-6-phosphate hydrolase | 3.848                             | 4.216                                      |
| STM1558  | STM1558     | putative glycosyl hydrolase                               | 4.235                             | 4.913                                      |
| STM1559  | STM1559     | putative glycosyl hydrolase                               | 3.700                             | 4.042                                      |
| STM1560  | STM1560     | putative alpha amylase                                    | 4.564                             | 3.429                                      |
| STM1869A | STM1869A    | hypothetical protein                                      | 3.520                             | 3.360                                      |
| STM1911  | STM1911     | putative cytoplasmic protein                              | 4.076                             | 4.975                                      |
| STM2612  | STM2612     | morphogenesis-like protein                                | 3.866                             | 3.938                                      |
| STM2715  | STM2715.S   | probable prophage lysozyme                                | 5.393                             | 4.265                                      |

|         |             |                                                 |       |       |
|---------|-------------|-------------------------------------------------|-------|-------|
| STM2831 | <i>mltB</i> | membrane-bound lytic murein transglycosylase B  | 3.973 | 4.662 |
| STM3051 | <i>bglA</i> | 6-phospho-beta-glucosidase A                    | 4.780 | 5.603 |
| STM3605 | STM3605     | putative phage endolysin                        | 3.335 | 2.892 |
| STM3679 | STM3679     | putative cytoplasmic protein                    | 3.525 | 3.644 |
| STM3775 | STM3775     | putative glycosyl hydrolase                     | 3.990 | 3.874 |
| STM4217 | STM4217     | putative soluble lytic murein transglycosylase  | 4.676 | 4.061 |
| STM4426 | <i>srfJ</i> | lysosomal glucosyl ceramidase-like protein      | 4.347 | 4.518 |
| STM4582 | <i>slt</i>  | soluble lytic murein transglycosylase           | 3.961 | 3.411 |
| STM1796 | <i>treA</i> | Trehalase                                       | 3.190 | 3.920 |
| STM4453 | <i>treC</i> | trehalose-6-phosphate hydrolase                 | 4.214 | 4.101 |
| STM3603 | <i>treF</i> | cytoplasmic trehalase                           | 5.309 | 5.165 |
| STM2567 | <i>yfhD</i> | putative periplasmic amino acid-binding protein | 3.314 | 4.280 |
| STM3749 | <i>yicI</i> | putative alpha xylosidase                       | 4.818 | 4.449 |
| STM4019 | <i>yihQ</i> | putative alpha-xylosidase                       | 3.913 | 3.818 |

182  
183  
184  
185  
186  
187  
188  
189  
190  
191  
192  
193  
194  
195  
196  
197

198 **Supplementary Table S2:** Glycan found on Caco-2 cells and their changes during *Salmonella* infection. Ratios  
199 greater than 1 means increase in glycan abundance during infection, less than 1 means decrease in glycan  
200 abundance during infection, ratios of about 1 means that glycan abundances did not change during infection,  
201 ratios equal to 0 means glycans disappeared during infection, and lastly, ratios that were undefined means that  
202 these are new glycans biosynthesized *de novo*. C = complex, H = hybrid, F = fucosylated, S = sialylated, and FS  
203 = fucosylated and sialylated.

|    | <b>Theoretical Glycan Mass*</b> | <b>Glycan Composition</b>                                                 | <b>Class</b> | <b>Ratio of Infected / Uninfected</b> | <b>Structure</b> |
|----|---------------------------------|---------------------------------------------------------------------------|--------------|---------------------------------------|------------------|
| 1  | 2061.751                        | Hex <sub>4</sub> HexNAc <sub>4</sub> Fuc <sub>2</sub> Neu5Ac <sub>1</sub> | C-FS         | 28.513                                |                  |
| 2  | 2953.047                        | Hex <sub>7</sub> HexNAc <sub>6</sub> Neu5Ac <sub>2</sub>                  | C-S          | 22.386                                |                  |
| 3  | 2776.020                        | Hex <sub>5</sub> HexNAc <sub>6</sub> Fuc <sub>3</sub> Neu5Ac <sub>1</sub> | C-FS         | 5.334                                 |                  |
| 4  | 2363.898                        | Hex <sub>3</sub> HexNAc <sub>7</sub> Fuc <sub>3</sub>                     | C-F          | 5.280                                 |                  |
| 5  | 1519.566                        | Hex <sub>3</sub> HexNAc <sub>5</sub>                                      | C            | 4.899                                 |                  |
| 6  | 2556.946                        | Hex <sub>4</sub> HexNAc <sub>5</sub> Fuc <sub>4</sub> Neu5Ac <sub>1</sub> | C-FS         | 4.143                                 |                  |
| 7  | 2280.825                        | Hex <sub>5</sub> HexNAc <sub>5</sub> Fuc <sub>1</sub> Neu5Ac <sub>1</sub> | C/H-FS       | 3.199                                 |                  |
| 8  | 2692.946                        | Hex <sub>7</sub> HexNAc <sub>4</sub> Fuc <sub>1</sub> Neu5Ac <sub>2</sub> | H-FS         | 3.106                                 |                  |
| 9  | 1681.619                        | Hex <sub>4</sub> HexNAc <sub>5</sub>                                      | C/H          | 2.962                                 |                  |
| 10 | 2938.073                        | Hex <sub>6</sub> HexNAc <sub>6</sub> Fuc <sub>3</sub> Neu5Ac <sub>1</sub> | C-FS         | 2.811                                 |                  |
| 11 | 2734.993                        | Hex <sub>6</sub> HexNAc <sub>5</sub> Fuc <sub>3</sub> Neu5Ac <sub>1</sub> | C/H-FS       | 2.808                                 |                  |
| 12 | 1925.725                        | Hex <sub>3</sub> HexNAc <sub>7</sub>                                      | C            | 2.769                                 |                  |
| 13 | 2014.761                        | Hex <sub>3</sub> HexNAc <sub>6</sub> Fuc <sub>2</sub>                     | C-F          | 2.505                                 |                  |
| 14 | 2167.777                        | Hex <sub>7</sub> HexNAc <sub>5</sub>                                      | H            | 2.341                                 |                  |
| 15 | 3099.105                        | Hex <sub>7</sub> HexNAc <sub>6</sub> Fuc <sub>1</sub> Neu5Ac <sub>2</sub> | C-FS         | 2.219                                 |                  |
| 16 | 1316.487                        | Hex <sub>3</sub> HexNAc <sub>4</sub>                                      | C            | 2.168                                 |                  |
| 17 | 1843.672                        | Hex <sub>5</sub> HexNAc <sub>5</sub>                                      | C/H          | 2.126                                 |                  |
| 18 | 1722.645                        | Hex <sub>3</sub> HexNAc <sub>6</sub>                                      | C            | 2.022                                 |                  |
| 19 | 2702.979                        | Hex <sub>6</sub> HexNAc <sub>7</sub> Neu5Ac <sub>1</sub>                  | C-S          | 2.022                                 |                  |



|    |          |                                                                           |       |       |                                                                                     |
|----|----------|---------------------------------------------------------------------------|-------|-------|-------------------------------------------------------------------------------------|
| 20 | 1884.698 | Hex <sub>4</sub> HexNAc <sub>6</sub>                                      | C     | 2.018 |    |
| 21 | 2160.819 | Hex <sub>3</sub> HexNAc <sub>6</sub> Fuc <sub>3</sub>                     | C-F   | 1.985 |    |
| 22 | 2071.783 | Hex <sub>3</sub> HexNAc <sub>7</sub> Fuc <sub>1</sub>                     | C-F   | 1.940 |    |
| 23 | 1558.539 | GlcNAc <sub>2</sub> Man <sub>7</sub>                                      | HM    | 1.803 |    |
| 24 | 2996.115 | Hex <sub>6</sub> HexNAc <sub>7</sub> Fuc <sub>4</sub>                     | C-F   | 1.792 |    |
| 25 | 1624.597 | Hex <sub>4</sub> HexNAc <sub>4</sub> Fuc <sub>1</sub>                     | C/H-F | 1.786 |    |
| 26 | 1478.539 | Hex <sub>4</sub> HexNAc <sub>4</sub>                                      | C/H   | 1.738 |    |
| 27 | 2379.893 | Hex <sub>4</sub> HexNAc <sub>7</sub> Fuc <sub>2</sub>                     | C-F   | 1.733 |    |
| 28 | 2937.052 | Hex <sub>6</sub> HexNAc <sub>6</sub> Fuc <sub>1</sub> Neu5Ac <sub>2</sub> | C-FS  | 1.707 |    |
| 29 | 1072.381 | GlcNAc <sub>2</sub> Man <sub>4</sub>                                      | HM    | 1.694 |    |
| 30 | 2686.984 | Hex <sub>5</sub> HexNAc <sub>7</sub> Fuc <sub>1</sub> Neu5Ac <sub>1</sub> | C-FS  | 1.641 |   |
| 31 | 1712.613 | Hex <sub>4</sub> HexNAc <sub>3</sub> Fuc <sub>1</sub> Neu5Ac <sub>1</sub> | C-FS  | 1.614 |  |

|    |          |                                                                           |        |       |  |
|----|----------|---------------------------------------------------------------------------|--------|-------|--|
| 32 | 2733.973 | Hex <sub>6</sub> HexNAc <sub>5</sub> Fuc <sub>1</sub> Neu5Ac <sub>2</sub> | C/H-FS | 1.515 |  |
| 33 | 910.328  | GlcNAc <sub>2</sub> Man <sub>3</sub>                                      | HM     | 1.501 |  |
| 34 | 1234.433 | GlcNAc <sub>2</sub> Man <sub>5</sub>                                      | HM     | 1.495 |  |
| 35 | 2718.999 | Hex <sub>5</sub> HexNAc <sub>5</sub> Fuc <sub>4</sub> Neu5Ac <sub>1</sub> | C-FS   | 1.473 |  |
| 36 | 1720.592 | GlcNAc <sub>2</sub> Man <sub>8</sub>                                      | HM     | 1.470 |  |
| 37 | 1665.624 | Hex <sub>3</sub> HexNAc <sub>5</sub> Fuc <sub>1</sub>                     | C-F    | 1.384 |  |
| 38 | 1396.486 | GlcNAc <sub>2</sub> Man <sub>6</sub>                                      | HM     | 1.356 |  |
| 39 | 1113.407 | Hex <sub>3</sub> HexNAc <sub>3</sub>                                      | C      | 1.356 |  |
| 40 | 1882.645 | GlcNAc <sub>2</sub> Man <sub>9</sub>                                      | HM     | 1.339 |  |
| 41 | 1973.735 | Hex <sub>4</sub> HexNAc <sub>5</sub> Fuc <sub>2</sub>                     | C/H-F  | 1.334 |  |
| 42 | 1827.677 | Hex <sub>4</sub> HexNAc <sub>5</sub> Fuc <sub>1</sub>                     | C/H-F  | 1.326 |  |
| 43 | 1802.645 | Hex <sub>6</sub> HexNAc <sub>4</sub>                                      | H      | 1.308 |  |
| 44 | 3302.185 | Hex <sub>7</sub> HexNAc <sub>7</sub> Fuc <sub>1</sub> Neu5Ac <sub>2</sub> | C-FS   | 1.298 |  |
| 45 | 2118.772 | Hex <sub>4</sub> HexNAc <sub>5</sub> Fuc <sub>1</sub> Neu5Ac <sub>1</sub> | C-FS   | 1.293 |  |
| 46 | 1989.729 | Hex <sub>5</sub> HexNAc <sub>5</sub> Fuc <sub>1</sub>                     | C/H-F  | 1.281 |  |
| 47 | 1437.513 | Hex <sub>5</sub> HexNAc <sub>3</sub>                                      | H      | 1.254 |  |
| 48 | 2369.861 | Hex <sub>5</sub> HexNAc <sub>4</sub> Fuc <sub>3</sub> Neu5Ac <sub>1</sub> | C/H-FS | 1.149 |  |
| 49 | 2321.851 | Hex <sub>4</sub> HexNAc <sub>6</sub> Fuc <sub>1</sub> Neu5Ac <sub>1</sub> | C-FS   | 1.137 |  |
| 50 | 2792.015 | Hex <sub>6</sub> HexNAc <sub>6</sub> Fuc <sub>2</sub> Neu5Ac <sub>1</sub> | C-FS   | 1.117 |  |
| 51 | 2483.904 | Hex <sub>5</sub> HexNAc <sub>6</sub> Fuc <sub>1</sub> Neu5Ac <sub>1</sub> | C-FS   | 1.117 |  |

|    |          |                                                                           |        |       |  |
|----|----------|---------------------------------------------------------------------------|--------|-------|--|
| 52 | 2087.778 | Hex <sub>4</sub> HexNAc <sub>7</sub>                                      | C      | 1.108 |  |
| 53 | 2217.841 | Hex <sub>3</sub> HexNAc <sub>7</sub> Fuc <sub>2</sub>                     | C-F    | 1.097 |  |
| 54 | 2134.767 | Hex <sub>5</sub> HexNAc <sub>5</sub> Neu5Ac <sub>1</sub>                  | C/H-S  | 1.094 |  |
| 55 | 2865.031 | Hex <sub>7</sub> HexNAc <sub>7</sub> Neu5Ac <sub>1</sub>                  | C-S    | 1.091 |  |
| 56 | 2046.751 | Hex <sub>5</sub> HexNAc <sub>6</sub>                                      | C      | 1.059 |  |
| 57 | 1275.460 | Hex <sub>4</sub> HexNAc <sub>3</sub>                                      | C/H    | 1.057 |  |
| 58 | 2223.803 | Hex <sub>5</sub> HexNAc <sub>4</sub> Fuc <sub>2</sub> Neu5Ac <sub>1</sub> | C/H-FS | 1.052 |  |
| 59 | 1640.592 | Hex <sub>5</sub> HexNAc <sub>4</sub>                                      | C/H    | 1.045 |  |
| 60 | 2688.004 | Hex <sub>5</sub> HexNAc <sub>7</sub> Fuc <sub>3</sub>                     | C-F    | 1.042 |  |
| 61 | 1915.693 | Hex <sub>4</sub> HexNAc <sub>4</sub> Fuc <sub>1</sub> Neu5Ac <sub>1</sub> | C-FS   | 1.033 |  |
| 62 | 3157.147 | Hex <sub>7</sub> HexNAc <sub>7</sub> Fuc <sub>2</sub> Neu5Ac <sub>1</sub> | C-FS   | 1.010 |  |
| 63 | 3303.205 | Hex <sub>7</sub> HexNAc <sub>7</sub> Fuc <sub>3</sub> Neu5Ac <sub>1</sub> | C-FS   | 1.008 |  |
| 64 | 2995.094 | Hex <sub>6</sub> HexNAc <sub>7</sub> Fuc <sub>2</sub> Neu5Ac <sub>1</sub> | C-FS   | 1.000 |  |
| 65 | 1462.544 | Hex <sub>3</sub> HexNAc <sub>4</sub> Fuc <sub>1</sub>                     | C-F    | 0.998 |  |
| 66 | 1745.623 | Hex <sub>6</sub> HexNAc <sub>3</sub> Fuc <sub>1</sub>                     | H-F    | 0.995 |  |
| 67 | 2629.962 | Hex <sub>5</sub> HexNAc <sub>6</sub> Fuc <sub>2</sub> Neu5Ac <sub>1</sub> | C-FS   | 0.990 |  |
| 68 | 1868.703 | Hex <sub>3</sub> HexNAc <sub>6</sub> Fuc <sub>1</sub>                     | C-F    | 0.972 |  |
| 69 | 1972.714 | Hex <sub>4</sub> HexNAc <sub>5</sub> Neu5Ac <sub>1</sub>                  | C-S    | 0.929 |  |
| 70 | 1769.635 | Hex <sub>4</sub> HexNAc <sub>4</sub> Neu5Ac <sub>1</sub>                  | C-S    | 0.925 |  |
| 71 | 2524.931 | Hex <sub>4</sub> HexNAc <sub>7</sub> Fuc <sub>1</sub> Neu5Ac <sub>1</sub> | C-FS   | 0.923 |  |

|    |          |                                                                           |        |       |  |
|----|----------|---------------------------------------------------------------------------|--------|-------|--|
| 72 | 2808.010 | Hex <sub>7</sub> HexNAc <sub>6</sub> Fuc <sub>1</sub> Neu5Ac <sub>1</sub> | C-FS   | 0.921 |  |
| 73 | 2866.052 | Hex <sub>7</sub> HexNAc <sub>7</sub> Fuc <sub>2</sub>                     | C-F    | 0.920 |  |
| 74 | 1259.465 | Hex <sub>3</sub> HexNAc <sub>3</sub> Fuc <sub>1</sub>                     | C-F    | 0.907 |  |
| 75 | 2880.031 | Hex <sub>6</sub> HexNAc <sub>5</sub> Fuc <sub>2</sub> Neu5Ac <sub>2</sub> | C/H-FS | 0.906 |  |
| 76 | 1599.566 | Hex <sub>6</sub> HexNAc <sub>3</sub>                                      | H      | 0.887 |  |
| 77 | 2833.042 | Hex <sub>5</sub> HexNAc <sub>7</sub> Fuc <sub>2</sub> Neu5Ac <sub>1</sub> | C-FS   | 0.886 |  |
| 78 | 2093.740 | Hex <sub>6</sub> HexNAc <sub>4</sub> Neu5Ac <sub>1</sub>                  | H-S    | 0.870 |  |
| 79 | 2775.000 | Hex <sub>5</sub> HexNAc <sub>6</sub> Fuc <sub>1</sub> Neu5Ac <sub>2</sub> | C-FS   | 0.853 |  |
| 80 | 2249.830 | Hex <sub>5</sub> HexNAc <sub>7</sub>                                      | C      | 0.851 |  |
| 81 | 2135.787 | Hex <sub>5</sub> HexNAc <sub>5</sub> Fuc <sub>2</sub>                     | C/H-F  | 0.850 |  |
| 82 | 2587.915 | Hex <sub>6</sub> HexNAc <sub>5</sub> Neu5Ac <sub>2</sub>                  | C/H-S  | 0.843 |  |
| 83 | 2790.995 | Hex <sub>6</sub> HexNAc <sub>6</sub> Neu5Ac <sub>2</sub>                  | C-S    | 0.809 |  |
| 84 | 2222.783 | Hex <sub>5</sub> HexNAc <sub>4</sub> Neu5Ac <sub>2</sub>                  | C-S    | 0.801 |  |
| 85 | 2176.814 | Hex <sub>4</sub> HexNAc <sub>6</sub> Fuc <sub>2</sub>                     | C-F    | 0.795 |  |
| 86 | 2425.862 | Hex <sub>5</sub> HexNAc <sub>5</sub> Neu5Ac <sub>2</sub>                  | C-S    | 0.789 |  |
| 87 | 3026.089 | Hex <sub>6</sub> HexNAc <sub>5</sub> Fuc <sub>3</sub> Neu5Ac <sub>2</sub> | C/H-FS | 0.784 |  |
| 88 | 2208.804 | Hex <sub>6</sub> HexNAc <sub>6</sub>                                      | C      | 0.765 |  |
| 89 | 2645.957 | Hex <sub>6</sub> HexNAc <sub>6</sub> Fuc <sub>1</sub> Neu5Ac <sub>1</sub> | C-FS   | 0.760 |  |
| 90 | 2525.951 | Hex <sub>4</sub> HexNAc <sub>7</sub> Fuc <sub>3</sub>                     | C-F    | 0.757 |  |
| 91 | 1380.491 | GlcNAc <sub>2</sub> Man <sub>5</sub> Fuc <sub>1</sub>                     | HM-F   | 0.756 |  |

|     |          |                                                                           |        |       |  |
|-----|----------|---------------------------------------------------------------------------|--------|-------|--|
| 92  | 1421.518 | Hex <sub>4</sub> HexNAc <sub>3</sub> Fuc <sub>1</sub>                     | C/H-F  | 0.749 |  |
| 93  | 2541.946 | Hex <sub>5</sub> HexNAc <sub>7</sub> Fuc <sub>2</sub>                     | C-F    | 0.748 |  |
| 94  | 2540.926 | Hex <sub>5</sub> HexNAc <sub>7</sub> Neu5Ac <sub>1</sub>                  | C-S    | 0.717 |  |
| 95  | 2296.820 | Hex <sub>6</sub> HexNAc <sub>5</sub> Neu5Ac <sub>1</sub>                  | C/H-S  | 0.710 |  |
| 96  | 2044.697 | GlcNAc <sub>2</sub> Man <sub>10</sub>                                     | HM     | 0.697 |  |
| 97  | 3229.168 | Hex <sub>6</sub> HexNAc <sub>6</sub> Fuc <sub>3</sub> Neu5Ac <sub>2</sub> | C-FS   | 0.694 |  |
| 98  | 1770.655 | Hex <sub>4</sub> HexNAc <sub>4</sub> Fuc <sub>2</sub>                     | C/H-F  | 0.690 |  |
| 99  | 2516.914 | Hex <sub>7</sub> HexNAc <sub>6</sub> Fuc <sub>1</sub>                     | C-F    | 0.689 |  |
| 100 | 2588.936 | Hex <sub>6</sub> HexNAc <sub>5</sub> Fuc <sub>2</sub> Neu5Ac <sub>1</sub> | C/H-FS | 0.684 |  |
| 101 | 2411.883 | Hex <sub>6</sub> HexNAc <sub>7</sub>                                      | C      | 0.680 |  |
| 102 | 2614.988 | Hex <sub>4</sub> HexNAc <sub>6</sub> Fuc <sub>5</sub>                     | C-F    | 0.678 |  |
| 103 | 2442.878 | Hex <sub>6</sub> HexNAc <sub>5</sub> Fuc <sub>1</sub> Neu5Ac <sub>1</sub> | C/H-FS | 0.668 |  |
| 104 | 2849.036 | Hex <sub>6</sub> HexNAc <sub>7</sub> Fuc <sub>1</sub> Neu5Ac <sub>1</sub> | C-FS   | 0.666 |  |
| 105 | 3083.110 | Hex <sub>6</sub> HexNAc <sub>6</sub> Fuc <sub>2</sub> Neu5Ac <sub>2</sub> | C-FS   | 0.664 |  |
| 106 | 2467.909 | Hex <sub>4</sub> HexNAc <sub>6</sub> Fuc <sub>2</sub> Neu5Ac <sub>1</sub> | C-FS   | 0.663 |  |
| 107 | 2703.999 | Hex <sub>6</sub> HexNAc <sub>7</sub> Fuc <sub>2</sub>                     | C-F    | 0.660 |  |
| 108 | 2030.756 | Hex <sub>4</sub> HexNAc <sub>6</sub> Fuc <sub>1</sub>                     | C-F    | 0.634 |  |
| 109 | 2978.079 | Hex <sub>5</sub> HexNAc <sub>7</sub> Fuc <sub>1</sub> Neu5Ac <sub>2</sub> | C-FS   | 0.617 |  |
| 110 | 2646.977 | Hex <sub>6</sub> HexNAc <sub>6</sub> Fuc <sub>3</sub>                     | C-F    | 0.602 |  |
| 111 | 3140.132 | Hex <sub>6</sub> HexNAc <sub>7</sub> Fuc <sub>1</sub> Neu5Ac <sub>2</sub> | C-FS   | 0.597 |  |

|     |          |                                                                           |        |       |  |
|-----|----------|---------------------------------------------------------------------------|--------|-------|--|
| 112 | 2557.941 | Hex <sub>6</sub> HexNAc <sub>7</sub> Fuc <sub>1</sub>                     | C-F    | 0.596 |  |
| 113 | 2077.745 | Hex <sub>5</sub> HexNAc <sub>4</sub> Fuc <sub>1</sub> Neu5Ac <sub>1</sub> | C/H-FS | 0.594 |  |
| 114 | 3011.089 | Hex <sub>7</sub> HexNAc <sub>7</sub> Fuc <sub>1</sub> Neu5Ac <sub>1</sub> | C-FS   | 0.592 |  |
| 115 | 2426.883 | Hex <sub>5</sub> HexNAc <sub>5</sub> Fuc <sub>2</sub> Neu5Ac <sub>1</sub> | C/H-FS | 0.592 |  |
| 116 | 1874.666 | Hex <sub>5</sub> HexNAc <sub>3</sub> Fuc <sub>1</sub> Neu5Ac <sub>1</sub> | H-FS   | 0.584 |  |
| 117 | 2354.862 | Hex <sub>6</sub> HexNAc <sub>6</sub> Fuc <sub>1</sub>                     | C-F    | 0.577 |  |
| 118 | 2233.835 | Hex <sub>4</sub> HexNAc <sub>7</sub> Fuc <sub>1</sub>                     | C-F    | 0.570 |  |
| 119 | 1583.571 | Hex <sub>5</sub> HexNAc <sub>3</sub> Fuc <sub>1</sub>                     | H-F    | 0.566 |  |
| 120 | 2571.920 | Hex <sub>5</sub> HexNAc <sub>5</sub> Fuc <sub>1</sub> Neu5Ac <sub>2</sub> | C-FS   | 0.566 |  |
| 121 | 1948.703 | Hex <sub>6</sub> HexNAc <sub>4</sub> Fuc <sub>1</sub>                     | H-F    | 0.564 |  |
| 122 | 2719.994 | Hex <sub>7</sub> HexNAc <sub>7</sub> Fuc <sub>1</sub>                     | C-F    | 0.563 |  |
| 123 | 2192.809 | Hex <sub>5</sub> HexNAc <sub>6</sub> Fuc <sub>1</sub>                     | C-F    | 0.561 |  |
| 124 | 1811.682 | Hex <sub>3</sub> HexNAc <sub>5</sub> Fuc <sub>2</sub>                     | C-F    | 0.553 |  |
| 125 | 2395.888 | Hex <sub>5</sub> HexNAc <sub>7</sub> Fuc <sub>1</sub>                     | C-F    | 0.547 |  |
| 126 | 1542.544 | GlcNAc <sub>2</sub> Man <sub>6</sub> Fuc <sub>1</sub>                     | HM-F   | 0.547 |  |
| 127 | 1786.650 | Hex <sub>5</sub> HexNAc <sub>4</sub> Fuc <sub>1</sub>                     | C/H-F  | 0.544 |  |
| 128 | 2281.845 | Hex <sub>5</sub> HexNAc <sub>5</sub> Fuc <sub>3</sub>                     | C/H-F  | 0.542 |  |
| 129 | 1964.698 | Hex <sub>7</sub> HexNAc <sub>4</sub>                                      | H      | 0.528 |  |
| 130 | 1608.602 | Hex <sub>3</sub> HexNAc <sub>4</sub> Fuc <sub>2</sub>                     | C-F    | 0.511 |  |
| 131 | 2662.972 | Hex <sub>7</sub> HexNAc <sub>6</sub> Fuc <sub>2</sub>                     | C-F    | 0.492 |  |

|     |          |                                                                           |        |       |  |
|-----|----------|---------------------------------------------------------------------------|--------|-------|--|
| 132 | 1728.608 | Hex <sub>5</sub> HexNAc <sub>3</sub> Neu5Ac <sub>1</sub>                  | H-S    | 0.489 |  |
| 133 | 2402.871 | Hex <sub>7</sub> HexNAc <sub>4</sub> Fuc <sub>3</sub>                     | H-F    | 0.488 |  |
| 134 | 1566.555 | Hex <sub>4</sub> HexNAc <sub>3</sub> Neu5Ac <sub>1</sub>                  | C-S    | 0.484 |  |
| 135 | 1890.661 | Hex <sub>6</sub> HexNAc <sub>3</sub> Neu5Ac <sub>1</sub>                  | H-S    | 0.482 |  |
| 136 | 2573.936 | Hex <sub>7</sub> HexNAc <sub>7</sub>                                      | C      | 0.480 |  |
| 137 | 2151.782 | Hex <sub>6</sub> HexNAc <sub>5</sub> Fuc <sub>1</sub>                     | C/H-F  | 0.479 |  |
| 138 | 2005.724 | Hex <sub>6</sub> HexNAc <sub>5</sub>                                      | C/H    | 0.467 |  |
| 139 | 2660.957 | Hex <sub>5</sub> HexNAc <sub>4</sub> Fuc <sub>3</sub> Neu5Ac <sub>2</sub> | C-FS   | 0.465 |  |
| 140 | 2207.808 | Hex <sub>4</sub> HexNAc <sub>4</sub> Fuc <sub>3</sub> Neu5Ac <sub>1</sub> | C-FS   | 0.459 |  |
| 141 | 2717.978 | Hex <sub>5</sub> HexNAc <sub>5</sub> Fuc <sub>2</sub> Neu5Ac <sub>2</sub> | C-FS   | 0.445 |  |
| 142 | 1056.386 | GlcNAc <sub>2</sub> Man <sub>3</sub> Fuc <sub>1</sub>                     | HM-F   | 0.441 |  |
| 143 | 2338.867 | Hex <sub>5</sub> HexNAc <sub>6</sub> Fuc <sub>2</sub>                     | C-F    | 0.440 |  |
| 144 | 2175.794 | Hex <sub>4</sub> HexNAc <sub>6</sub> Neu5Ac <sub>1</sub>                  | C-S    | 0.431 |  |
| 145 | 2832.021 | Hex <sub>5</sub> HexNAc <sub>7</sub> Neu5Ac <sub>2</sub>                  | C-S    | 0.424 |  |
| 146 | 2264.830 | Hex <sub>4</sub> HexNAc <sub>5</sub> Fuc <sub>2</sub> Neu5Ac <sub>1</sub> | C-FS   | 0.421 |  |
| 147 | 2443.898 | Hex <sub>6</sub> HexNAc <sub>5</sub> Fuc <sub>3</sub>                     | C/H-F  | 0.421 |  |
| 148 | 2823.009 | Hex <sub>6</sub> HexNAc <sub>4</sub> Fuc <sub>3</sub> Neu5Ac <sub>2</sub> | H-FS   | 0.414 |  |
| 149 | 2036.719 | Hex <sub>6</sub> HexNAc <sub>3</sub> Fuc <sub>1</sub> Neu5Ac <sub>1</sub> | H-FS   | 0.413 |  |
| 150 | 2572.941 | Hex <sub>5</sub> HexNAc <sub>5</sub> Fuc <sub>3</sub> Neu5Ac <sub>1</sub> | C/H-FS | 0.402 |  |
| 151 | 1931.688 | Hex <sub>5</sub> HexNAc <sub>4</sub> Neu5Ac <sub>1</sub>                  | C/H-S  | 0.384 |  |

|     |          |                                                                           |       |       |  |
|-----|----------|---------------------------------------------------------------------------|-------|-------|--|
| 152 | 2500.920 | Hex <sub>6</sub> HexNAc <sub>6</sub> Fuc <sub>2</sub>                     | C-F   | 0.374 |  |
| 153 | 2368.841 | Hex <sub>5</sub> HexNAc <sub>4</sub> Fuc <sub>1</sub> Neu5Ac <sub>2</sub> | C-FS  | 0.370 |  |
| 154 | 1218.438 | GlcNAc <sub>2</sub> Man <sub>4</sub> Fuc <sub>1</sub>                     | HM-F  | 0.352 |  |
| 155 | 2239.798 | Hex <sub>6</sub> HexNAc <sub>4</sub> Fuc <sub>1</sub> Neu5Ac <sub>1</sub> | H-FS  | 0.296 |  |
| 156 | 2255.793 | Hex <sub>7</sub> HexNAc <sub>4</sub> Neu5Ac <sub>1</sub>                  | H-S   | 0.285 |  |
| 157 | 2028.702 | GlcNAc <sub>2</sub> Man <sub>9</sub> Fuc <sub>1</sub>                     | HM-F  | 0.283 |  |
| 158 | 1704.597 | GlcNAc <sub>2</sub> Man <sub>7</sub> Fuc <sub>1</sub>                     | HM-F  | 0.276 |  |
| 159 | 3025.068 | Hex <sub>6</sub> HexNAc <sub>5</sub> Fuc <sub>1</sub> Neu5Ac <sub>3</sub> | C-FS  | 0.274 |  |
| 160 | 2401.851 | Hex <sub>7</sub> HexNAc <sub>4</sub> Fuc <sub>1</sub> Neu5Ac <sub>1</sub> | H-FS  | 0.267 |  |
| 161 | 3158.168 | Hex <sub>7</sub> HexNAc <sub>7</sub> Fuc <sub>4</sub>                     | C-F   | 0.235 |  |
| 162 | 2378.873 | Hex <sub>4</sub> HexNAc <sub>7</sub> Neu5Ac <sub>1</sub>                  | C-S   | 0.228 |  |
| 163 | 2661.952 | Hex <sub>7</sub> HexNAc <sub>6</sub> Neu5Ac <sub>1</sub>                  | C-S   | 0.223 |  |
| 164 | 1932.708 | Hex <sub>5</sub> HexNAc <sub>4</sub> Fuc <sub>2</sub>                     | C/H-F | 0.207 |  |
| 165 | 2954.068 | Hex <sub>7</sub> HexNAc <sub>6</sub> Fuc <sub>2</sub> Neu5Ac <sub>1</sub> | C-FS  | 0.196 |  |
| 166 | 3448.243 | Hex <sub>7</sub> HexNAc <sub>7</sub> Fuc <sub>2</sub> Neu5Ac <sub>2</sub> | C-FS  | 0.184 |  |
| 167 | 3228.148 | Hex <sub>6</sub> HexNAc <sub>6</sub> Fuc <sub>1</sub> Neu5Ac <sub>3</sub> | C-FS  | 0.182 |  |
| 168 | 1916.713 | Hex <sub>4</sub> HexNAc <sub>4</sub> Fuc <sub>3</sub>                     | C/H-F | 0.171 |  |
| 169 | 2777.040 | Hex <sub>5</sub> HexNAc <sub>6</sub> Fuc <sub>5</sub>                     | C-F   | 0.169 |  |
| 170 | 2410.888 | Hex <sub>4</sub> HexNAc <sub>5</sub> Fuc <sub>3</sub> Neu5Ac <sub>1</sub> | C-FS  | 0.166 |  |
| 171 | 2337.846 | Hex <sub>5</sub> HexNAc <sub>6</sub> Neu5Ac <sub>1</sub>                  | C-S   | 0.161 |  |



|     |          |                                                                           |      |       |  |
|-----|----------|---------------------------------------------------------------------------|------|-------|--|
| 172 | 2955.088 | Hex <sub>7</sub> HexNAc <sub>6</sub> Fuc <sub>4</sub>                     | C-F  | 0.147 |  |
| 173 | 2509.956 | Hex <sub>3</sub> HexNAc <sub>7</sub> Fuc <sub>4</sub>                     | C-F  | 0.138 |  |
| 174 | 3593.280 | Hex <sub>7</sub> HexNAc <sub>7</sub> Fuc <sub>1</sub> Neu5Ac <sub>3</sub> | C-FS | 0.133 |  |
| 175 | 1891.681 | Hex <sub>6</sub> HexNAc <sub>3</sub> Fuc <sub>2</sub>                     | H-F  | 0.126 |  |
| 176 | 3084.131 | Hex <sub>6</sub> HexNAc <sub>6</sub> Fuc <sub>4</sub> Neu5Ac <sub>1</sub> | C-FS | 0.082 |  |
| 177 | 2879.011 | Hex <sub>6</sub> HexNAc <sub>5</sub> Neu5Ac <sub>3</sub>                  | C-S  | 0.067 |  |
| 178 | 3375.226 | Hex <sub>6</sub> HexNAc <sub>6</sub> Fuc <sub>4</sub> Neu5Ac <sub>2</sub> | C-FS | 0.041 |  |
| 179 | 2110.756 | Hex <sub>7</sub> HexNAc <sub>4</sub> Fuc <sub>1</sub>                     | H-F  | 0.000 |  |
| 180 | 1405.523 | Hex <sub>3</sub> HexNAc <sub>3</sub> Fuc <sub>2</sub>                     | C-F  | 0.000 |  |
| 181 | 2322.872 | Hex <sub>4</sub> HexNAc <sub>6</sub> Fuc <sub>3</sub>                     | C-F  | 0.000 |  |
| 182 | 2896.026 | Hex <sub>7</sub> HexNAc <sub>5</sub> Fuc <sub>1</sub> Neu5Ac <sub>2</sub> | H-FS | 0.000 |  |
| 183 | 3431.227 | Hex <sub>6</sub> HexNAc <sub>7</sub> Fuc <sub>1</sub> Neu5Ac <sub>3</sub> | C-FS | 0.000 |  |
| 184 | 3390.201 | Hex <sub>7</sub> HexNAc <sub>6</sub> Fuc <sub>1</sub> Neu5Ac <sub>3</sub> | C-FS | 0.000 |  |
| 185 | 3286.190 | Hex <sub>6</sub> HexNAc <sub>7</sub> Fuc <sub>2</sub> Neu5Ac <sub>2</sub> | C-FS | 0.000 |  |
| 186 | 3374.206 | Hex <sub>6</sub> HexNAc <sub>6</sub> Fuc <sub>2</sub> Neu5Ac <sub>3</sub> | C-FS | 0.000 |  |
| 187 | 2979.099 | Hex <sub>5</sub> HexNAc <sub>7</sub> Fuc <sub>3</sub> Neu5Ac <sub>1</sub> | C-FS | 0.000 |  |
| 188 | 2760.025 | Hex <sub>4</sub> HexNAc <sub>6</sub> Fuc <sub>4</sub> Neu5Ac <sub>1</sub> | C-FS | 0.000 |  |
| 189 | 2499.899 | Hex <sub>6</sub> HexNAc <sub>6</sub> Neu5Ac <sub>1</sub>                  | C-S  | 0.000 |  |
| 190 | 3156.127 | Hex <sub>7</sub> HexNAc <sub>7</sub> Neu5Ac <sub>2</sub>                  | C-S  | 0.000 |  |
| 191 | 3082.090 | Hex <sub>6</sub> HexNAc <sub>6</sub> Neu5Ac <sub>3</sub>                  | C-S  | 0.000 |  |

233

|     |          |                                                                           |      |           |  |
|-----|----------|---------------------------------------------------------------------------|------|-----------|--|
| 192 | 2850.057 | Hex <sub>6</sub> HexNAc <sub>7</sub> Fuc <sub>3</sub>                     | C-F  | Undefined |  |
| 193 | 3012.110 | Hex <sub>7</sub> HexNAc <sub>7</sub> Fuc <sub>3</sub>                     | C-F  | Undefined |  |
| 194 | 2385.856 | Hex <sub>6</sub> HexNAc <sub>4</sub> Fuc <sub>2</sub> Neu5Ac <sub>1</sub> | H-FS | Undefined |  |
| 195 | 3141.152 | Hex <sub>6</sub> HexNAc <sub>7</sub> Fuc <sub>3</sub> Neu5Ac <sub>1</sub> | C-FS | Undefined |  |
| 196 | 2693.967 | Hex <sub>7</sub> HexNAc <sub>4</sub> Fuc <sub>3</sub> Neu5Ac <sub>1</sub> | H-FS | Undefined |  |
| 197 | 3449.263 | Hex <sub>7</sub> HexNAc <sub>7</sub> Fuc <sub>4</sub> Neu5Ac <sub>1</sub> | C-FS | Undefined |  |
| 198 | 3521.284 | Hex <sub>6</sub> HexNAc <sub>6</sub> Fuc <sub>5</sub> Neu5Ac <sub>2</sub> | C-FS | Undefined |  |

234

235 \*The observed mass from analysis was used to match the theoretical mass in the retrosynthetic database<sup>1</sup>.

236

237

238

239

240

241

242

243

244

245

246

247

248

249 **Supplementary Table S3:** Differentially expressed genes following *Salmonella* LT2 challenge. Caco-2 cells  
 250 treated with *Salmonella* LT2 for 60 minutes displayed a significant induction directly involved in glycan  
 251 metabolism. Gene induction reported as Log<sub>2</sub> ratio (*Salmonella* treated/not treated Caco-2) ( $p \leq 0.05$ , FDR  
 252 0.01).

| Symbol   | Entrez Gene Name                                                                                                               | Log <sub>2</sub> Ratio | Cellular Location   |
|----------|--------------------------------------------------------------------------------------------------------------------------------|------------------------|---------------------|
| ALG3     | ALG3, alpha-1,3- mannosyltransferase                                                                                           | 1.004                  | Cytoplasm           |
| ALG9     | ALG9, alpha-1,2-mannosyltransferase                                                                                            | 0.481                  | Cytoplasm           |
| B3GALNT2 | beta-1,3- <i>N</i> -acetylgalactosaminyltransferase 2                                                                          | 0.718                  | Cytoplasm           |
| B3GALT5  | UDP-Gal:betaGlcNAc beta 1,3-galactosyltransferase, polypeptide 5                                                               | 0.098                  | Cytoplasm           |
| B3GAT3   | beta-1,3-glucuronyltransferase 3 (glucuronosyltransferase I)                                                                   | 0.576                  | Cytoplasm           |
| B3GNT1   | UDP-GlcNAc:betaGal beta-1,3- <i>N</i> -acetylglucosaminyltransferase 1                                                         | 0.820                  | Cytoplasm           |
| B3GNT2   | UDP-GlcNAc:betaGal beta-1,3- <i>N</i> -acetylglucosaminyltransferase 2                                                         | 0.159                  | Cytoplasm           |
| B3GNT3   | UDP-GlcNAc:betaGal beta-1,3- <i>N</i> -acetylglucosaminyltransferase 3                                                         | 0.293                  | Cytoplasm           |
| B3GNT4   | UDP-GlcNAc:betaGal beta-1,3- <i>N</i> -acetylglucosaminyltransferase 4                                                         | 0.366                  | Plasma Membrane     |
| B3GNT7   | UDP-GlcNAc:betaGal beta-1,3- <i>N</i> -acetylglucosaminyltransferase 7                                                         | 0.726                  | Cytoplasm           |
| B3GNTL1  | UDP-GlcNAc:betaGal beta-1,3- <i>N</i> -acetylglucosaminyltransferase-like 1                                                    | 0.811                  | Other               |
| B4GALNT4 | beta-1,4- <i>N</i> -acetyl-galactosaminyl transferase 4                                                                        | 0.189                  | Extracellular Space |
| B4GALT1  | UDP-Gal:betaGlcNAc beta 1,4-galactosyltransferase, polypeptide 1                                                               | 1.371                  | Cytoplasm           |
| B4GALT3  | UDP-Gal:betaGlcNAc beta 1,4-galactosyltransferase, polypeptide 3                                                               | 0.799                  | Cytoplasm           |
| B4GALT7  | xylosylprotein beta 1,4-galactosyltransferase, polypeptide 7                                                                   | 0.439                  | Cytoplasm           |
| DPAGT1   | dolichyl-phosphate (UDP- <i>N</i> -acetylglucosamine) <i>N</i> -acetylglucosaminephosphotransferase 1 (GlcNAc-1-P transferase) | 1.063                  | Cytoplasm           |
| EDEM1    | ER degradation enhancer, mannosidase alpha-like 1                                                                              | 0.319                  | Cytoplasm           |
| EDEM2    | ER degradation enhancer, mannosidase alpha-like 2                                                                              | 0.532                  | Cytoplasm           |
| FUCA2    | fucosidase, alpha-L- 2, plasma                                                                                                 | 0.108                  | Extracellular Space |
| FUT1     | fucosyltransferase 1 (galactoside 2-alpha-L-fucosyltransferase, H blood group)                                                 | 0.522                  | Cytoplasm           |
| FUT11    | fucosyltransferase 11 (alpha (1,3) fucosyltransferase)                                                                         | 0.489                  | Cytoplasm           |

|          |                                                                                                 |       |                     |
|----------|-------------------------------------------------------------------------------------------------|-------|---------------------|
| FUT2     | fucosyltransferase 2 (secretor status included)                                                 | 1.004 | Cytoplasm           |
| FUT4     | fucosyltransferase 4 (alpha (1,3) fucosyltransferase, myeloid-specific)                         | 0.250 | Cytoplasm           |
| FUT5     | fucosyltransferase 5 (alpha (1,3) fucosyltransferase)                                           | 0.166 | Cytoplasm           |
| FUT6     | fucosyltransferase 6 (alpha (1,3) fucosyltransferase)                                           | 0.345 | Cytoplasm           |
| FUT7     | fucosyltransferase 7 (alpha (1,3) fucosyltransferase)                                           | 0.310 | Cytoplasm           |
| FUT9     | fucosyltransferase 9 (alpha (1,3) fucosyltransferase)                                           | 0.063 | Cytoplasm           |
| POFUT1   | <i>O</i> -fucosyltransferase 1 - protein                                                        | 0.659 | Cytoplasm           |
| POFUT2   | <i>O</i> -fucosyltransferase 2 - protein                                                        | 0.622 | Cytoplasm           |
| GANAB    | glucosidase, alpha; neutral AB                                                                  | 0.829 | Cytoplasm           |
| GLB1     | galactosidase, beta 1                                                                           | 0.672 | Cytoplasm           |
| GLB1L2   | galactosidase, beta 1-like 2                                                                    | 0.463 | Other               |
| MAN1A2   | mannosidase, alpha, class 1A, member 2                                                          | 0.256 | Cytoplasm           |
| MAN1B1   | mannosidase, alpha, class 1B, member 1                                                          | 0.583 | Cytoplasm           |
| MAN1C1   | mannosidase, alpha, class 1C, member 1                                                          | 0.391 | Cytoplasm           |
| MAN2A2   | mannosidase, alpha, class 2A, member 2                                                          | 0.342 | Cytoplasm           |
| MAN2B1   | mannosidase, alpha, class 2B, member 1                                                          | 0.863 | Cytoplasm           |
| MAN2B2   | mannosidase, alpha, class 2B, member 2                                                          | 0.619 | Cytoplasm           |
| MAN2C1   | mannosidase, alpha, class 2C, member 1                                                          | 0.624 | Cytoplasm           |
| MANBAL   | mannosidase, beta A, lysosomal-like                                                             | 0.577 | Other               |
| MANEAL   | mannosidase, endo-alpha-like                                                                    | 0.235 | Other               |
| MGAT1    | mannosyl (alpha-1,3-)-glycoprotein beta-1,2- <i>N</i> -acetylglucosaminyltransferase            | 0.559 | Cytoplasm           |
| MGAT3    | mannosyl (beta-1,4-)-glycoprotein beta-1,4- <i>N</i> -acetylglucosaminyltransferase             | 0.712 | Cytoplasm           |
| MGAT4B   | mannosyl (alpha-1,3-)-glycoprotein beta-1,4- <i>N</i> -acetylglucosaminyltransferase, isozyme B | 0.810 | Cytoplasm           |
| MGAT5    | mannosyl (alpha-1,6-)-glycoprotein beta-1,6- <i>N</i> -acetyl-glycosaminyltransferase           | 2.156 | Cytoplasm           |
| MOGS     | mannosyl-oligosaccharide glucosidase                                                            | 0.684 | Cytoplasm           |
| MOGAT3   | monoacylglycerol <i>O</i> -acyltransferase 3                                                    | 0.890 | Other               |
| NAGA     | <i>N</i> -acetylgalactosaminidase, alpha-                                                       | 0.942 | Cytoplasm           |
| NAGK     | <i>N</i> -acetylglucosamine kinase                                                              | 0.519 | Cytoplasm           |
| NAGLU    | <i>N</i> -acetylglucosaminidase, alpha                                                          | 0.479 | Cytoplasm           |
| NAGPA    | <i>N</i> -acetylglucosamine-1-phosphodiester alpha- <i>N</i> -acetylglucosaminidase             | 0.380 | Cytoplasm           |
| NAGS     | <i>N</i> -acetylglutamate synthase                                                              | 0.614 | Cytoplasm           |
| NANS     | <i>N</i> -acetylneuraminic acid synthase                                                        | 0.152 | Cytoplasm           |
| NEU1     | sialidase 1 (lysosomal sialidase)                                                               | 0.789 | Cytoplasm, lysosome |
| NEU3     | sialidase 3 (membrane sialidase)                                                                | 0.214 | Plasma Membrane     |
| SIGLEC11 | sialic acid binding Ig-like lectin 11                                                           | 0.483 | Plasma Membrane     |
| SIGLEC5  | sialic acid binding Ig-like lectin 5                                                            | 0.419 | Plasma Membrane     |
| SIGLEC6  | sialic acid binding Ig-like lectin 6                                                            | 0.545 | Extracellular       |

|            |                                                                                                                                 |       | Space           |
|------------|---------------------------------------------------------------------------------------------------------------------------------|-------|-----------------|
| ST3GAL1    | ST3 beta-galactoside alpha-2,3-sialyltransferase 1                                                                              | 0.900 | Cytoplasm       |
| ST3GAL2    | ST3 beta-galactoside alpha-2,3-sialyltransferase 2                                                                              | 0.742 | Cytoplasm       |
| ST3GAL4    | ST3 beta-galactoside alpha-2,3-sialyltransferase 4                                                                              | 0.253 | Cytoplasm       |
| ST6GAL1    | ST6 beta-galactosamide alpha-2,6-sialyltransferase 1                                                                            | 0.429 | Cytoplasm       |
| ST6GAL2    | ST6 beta-galactosamide alpha-2,6-sialyltransferase 2                                                                            | 0.288 | Cytoplasm       |
| ST6GALNAC1 | ST6 (alpha- <i>N</i> -acetyl-neuraminyl-2,3-beta-galactosyl-1,3)- <i>N</i> -acetylgalactosaminide alpha-2,6-sialyltransferase 1 | 0.482 | Cytoplasm       |
| ST6GALNAC2 | ST6 (alpha- <i>N</i> -acetyl-neuraminyl-2,3-beta-galactosyl-1,3)- <i>N</i> -acetylgalactosaminide alpha-2,6-sialyltransferase 2 | 0.327 | Cytoplasm       |
| NGLY1      | <i>N</i> -glycanase 1                                                                                                           | 0.957 | Cytoplasm       |
| STT3A      | STT3A, subunit of the oligosaccharyltransferase complex (catalytic)                                                             | 0.162 | Plasma Membrane |
| STT3B      | STT3B, subunit of the oligosaccharyltransferase complex (catalytic)                                                             | 0.856 | Cytoplasm       |

253

254

255

256

257

258

259

260

261

262

263

264

265

266

267

268

269 **Supplementary Table S4.** Human sialidase and sialyltransferase expression during infection with *Salmonella* LT2. Data adapted from IPA, Crespo  
 270 et al.<sup>2</sup> and this study.

| Symbol                                                                                                                                 | Name                                                       | Cellular Location          | Preferred substrates                 | Glycan specificity                           | Function                                                                                      | Regulation    |
|----------------------------------------------------------------------------------------------------------------------------------------|------------------------------------------------------------|----------------------------|--------------------------------------|----------------------------------------------|-----------------------------------------------------------------------------------------------|---------------|
| Neu1                                                                                                                                   | Neuraminidase 1                                            | Lysozome                   | Sia $\alpha$ 2,3<br>Sia $\alpha$ 2,6 | Glycoproteins<br>Glycolipids                 | Cleaves terminal sialic acid residues from substrates such as glycoproteins and glycolipids   | Induced       |
| Neu2                                                                                                                                   | Neuraminidase 2                                            | Cytosol                    | Sia $\alpha$ 2,3<br>Sia $\alpha$ 2,6 | Glycoproteins<br>Glycolipids                 | Cleaves terminal sialic acid residues from substrates such as glycoproteins and glycolipids   | Not regulated |
| Neu3                                                                                                                                   | Neuraminidase 3                                            | Cell membrane              | Sia $\alpha$ 2,3<br>Sia $\alpha$ 2,6 | Gangliosides<br>Lactosylceramide             | Preferentially hydrolyzes gangliosides with alpha-2,3 or alpha-2,6 linkages                   | Induced       |
| Neu4                                                                                                                                   | Neuraminidase 4                                            | Inner membrane             | Sia $\alpha$ 2,3<br>Sia $\alpha$ 2,6 | Glycoproteins<br>Glycolipids<br>Gangliosides | Remove terminal sialic acid residues from various sialo derivatives                           | Not regulated |
| <b>ST3GAL family - catalyzes the addition of sialic acids to a terminal galactose of glycans in an <math>\alpha</math>-2,3 linkage</b> |                                                            |                            |                                      |                                              |                                                                                               |               |
| ST3GAL-1                                                                                                                               | ST3 $\beta$ -galactoside $\alpha$ -2,3-sialyltransferase 1 | Cell membrane<br>Cytoplasm | Gal $\beta$ 1,3GalNAc                | <i>O</i> -glycan                             | Catalyzes the transfer of sialic acid from CMP-sialic acid to galactose-containing substrates | Induced       |
| ST3GAL-2                                                                                                                               | ST3 $\beta$ -galactoside $\alpha$ -2,3-sialyltransferase 2 | Cell membrane<br>Cytoplasm | Gal $\beta$ 1,3GalNAc                | <i>O</i> -glycan                             | Catalyzes the transfer of sialic acid from CMP-sialic acid to                                 | Induced       |

|                                                                                                                                    |                                                            |                            |                             |                                    |                                                                                                                                         |               |
|------------------------------------------------------------------------------------------------------------------------------------|------------------------------------------------------------|----------------------------|-----------------------------|------------------------------------|-----------------------------------------------------------------------------------------------------------------------------------------|---------------|
|                                                                                                                                    |                                                            |                            |                             |                                    | galactose-containing substrates                                                                                                         |               |
| ST3GAL-3                                                                                                                           | ST3 $\beta$ -galactoside $\alpha$ -2,3-sialyltransferase 3 | Cell membrane<br>Cytoplasm | Gal $\beta$ 1,3(4)GlcNAc    | <i>O</i> -glycan, <i>N</i> -glycan | Catalyzes the transfer of sialic acid from CMP-sialic acid to galactose-containing substrates                                           | Not regulated |
| ST3GAL-4                                                                                                                           | ST3 $\beta$ -galactoside $\alpha$ -2,3-sialyltransferase 4 | Cell membrane<br>Cytoplasm | Gal $\beta$ 1,4(3)GlcNAc    | <i>N</i> -glycan, <i>O</i> -glycan | Catalyzes the transfer of sialic acid from CMP-sialic acid to galactose-containing substrates                                           | Induced       |
| ST3GAL-5                                                                                                                           | ST3 $\beta$ -galactoside $\alpha$ -2,3-sialyltransferase 5 | Cell membrane<br>Cytoplasm | Gal $\beta$ 1,4Glc-ceramide | Glycolipid                         | Catalyzes the transfer of sialic acid from CMP-sialic acid to galactose-containing substrates                                           | Not regulated |
| ST3GAL-6                                                                                                                           | ST3 $\beta$ -galactoside $\alpha$ -2,3-sialyltransferase 6 | Cell membrane<br>Cytoplasm | Gal $\beta$ 1,4GlcNAc       | <i>N</i> -glycan                   | Catalyzes the transfer of sialic acid from CMP-sialic acid to galactose-containing substrates                                           | Not regulated |
| <b>ST6GAL family - transfers <math>\alpha</math>-2,6 linking sialic acids to a terminal galactose residues of <i>N</i>-glycans</b> |                                                            |                            |                             |                                    |                                                                                                                                         |               |
| ST6GAL-1                                                                                                                           | ST6 $\beta$ -galactoside $\alpha$ -2,6-sialyltransferase 1 | Cell membrane<br>Cytoplasm | Gal $\beta$ 1,4GlcNAc       | <i>N</i> -glycan                   | Catalyzes the transfer of sialic acid from CMP-sialic acid to galactose-containing substrates. Considered to be an inflammatory marker. | Induced       |
| ST6GAL-2                                                                                                                           | ST6 $\beta$ -galactoside $\alpha$ -2,6-sialyltransferase 2 | Cell membrane<br>Cytoplasm | Gal $\beta$ 1,4GlcNAc       | <i>N</i> -glycan                   | Catalyzes the transfer of sialic acid from CMP-sialic acid to galactose-containing                                                      | Induced       |

|                                                                                                                                                                      |                                                                                                                                               |                            |                                                       |                  |                                                                                                                                                                                                          |               |
|----------------------------------------------------------------------------------------------------------------------------------------------------------------------|-----------------------------------------------------------------------------------------------------------------------------------------------|----------------------------|-------------------------------------------------------|------------------|----------------------------------------------------------------------------------------------------------------------------------------------------------------------------------------------------------|---------------|
|                                                                                                                                                                      |                                                                                                                                               |                            |                                                       |                  | substrates                                                                                                                                                                                               |               |
| <b>ST6GALNAc family - adds sialic acids to terminal <i>N</i>-acetylgalactosamine residues of glycoproteins and glycolipids in an <math>\alpha</math>-2,6 linkage</b> |                                                                                                                                               |                            |                                                       |                  |                                                                                                                                                                                                          |               |
| ST6GALNAc-1                                                                                                                                                          | ST6 ( $\alpha$ - <i>N</i> -acetylneuraminyl-2,3- $\beta$ -galactosyl-1,3)- <i>N</i> -acetylgalactosaminid e $\alpha$ -2,6-sialyltransferase 1 | Cell membrane<br>Cytoplasm | GalNAc $\alpha$ 1<br>Gal $\beta$ 1,3GalNAc $\alpha$ 1 | <i>O</i> -glycan | Transfers a sialic acid, <i>N</i> -acetylneuraminic acid (NeuAc), in an $\alpha$ -2,6 linkage to O-linked GalNAc residues                                                                                | Induced       |
| ST6GALNAc-2                                                                                                                                                          | ST6 ( $\alpha$ - <i>N</i> -acetylneuraminyl-2,3- $\beta$ -galactosyl-1,3)- <i>N</i> -acetylgalactosaminid e $\alpha$ -2,6-sialyltransferase 2 | Cell membrane<br>Cytoplasm | Gal $\beta$ 1,3GalNAc $\alpha$ 1                      | <i>O</i> -glycan | Add sialic acids to the nonreducing ends of glycoconjugates. At the cell surface, these modifications have roles in cell-cell and cell-substrate interactions, bacterial adhesion, and protein targeting | Induced       |
| ST6GALNAc-3                                                                                                                                                          | ST6 ( $\alpha$ - <i>N</i> -acetylneuraminyl-2,3- $\beta$ -galactosyl-1,3)- <i>N</i> -acetylgalactosaminid e $\alpha$ -2,6-sialyltransferase 3 | Cell membrane<br>Cytoplasm | Sia $\alpha$ 2,3Gal $\beta$ 1,3GalNAc                 | <i>O</i> -glycan | Transfer sialic acids from CMP-sialic acid to terminal positions of carbohydrate groups in glycoproteins and glycolipids                                                                                 | Not regulated |
| ST6GALNAc-4                                                                                                                                                          | ST6 ( $\alpha$ - <i>N</i> -acetylneuraminyl-2,3- $\beta$ -galactosyl-1,3)- <i>N</i> -acetylgalactosaminid e $\alpha$ -2,6-sialyltransferase 4 | Cell membrane<br>Cytoplasm | Sia $\alpha$ 2,3Gal $\beta$ 1,3GalNAc                 | <i>O</i> -glycan | Catalyzes the transfer of sialic acid from CMP-sialic acid to galactose-containing substrates. The encoded protein prefers glycoproteins rather than glycolipids as substrates and shows                 | Not regulated |



|                                                                                                                                                                               |                                                                                                                                                |                            |                                             |                  |                                                                                                                                                                                                         |               |
|-------------------------------------------------------------------------------------------------------------------------------------------------------------------------------|------------------------------------------------------------------------------------------------------------------------------------------------|----------------------------|---------------------------------------------|------------------|---------------------------------------------------------------------------------------------------------------------------------------------------------------------------------------------------------|---------------|
|                                                                                                                                                                               |                                                                                                                                                |                            |                                             |                  | restricted substrate specificity, utilizing only the trisaccharide sequence Neu5Ac- $\alpha$ -2,3-Gal- $\beta$ -1,3-GalNAc. In addition, it is involved in the synthesis of ganglioside GD1A from GM1B. |               |
| ST6GALNAc-5                                                                                                                                                                   | ST6 ( $\alpha$ - <i>N</i> -acetylneuraminyl-2,3- $\beta$ -galactosyl-1,3)- <i>N</i> -acetylgalactosaminidase $\alpha$ -2,6-sialyltransferase 5 | Cell membrane<br>Cytoplasm | GM1b                                        | Glycolipid       | Modify proteins and ceramides on the cell surface to alter cell-cell or cell-extracellular matrix interactions                                                                                          | Not regulated |
| ST6GALNAc-6                                                                                                                                                                   | ST6 ( $\alpha$ - <i>N</i> -acetylneuraminyl-2,3- $\beta$ -galactosyl-1,3)- <i>N</i> -acetylgalactosaminidase $\alpha$ -2,6-sialyltransferase 6 | Cell membrane<br>Cytoplasm | All $\alpha$ -series gangliosides           | Glycolipid       | Modify proteins and ceramides on the cell surface to alter cell-cell or cell-extracellular matrix interactions                                                                                          | Not regulated |
| <b>ST8SIA family - promotes the linkage to another sialic acid residue in <i>N</i>- or <i>O</i>-glycans in an <math>\alpha</math>-2,8 linkage (expressed in neural cells)</b> |                                                                                                                                                |                            |                                             |                  |                                                                                                                                                                                                         |               |
| ST8SIA-1                                                                                                                                                                      | ST8 $\alpha$ - <i>N</i> -acetylneuraminidase $\alpha$ -2,8-sialyltransferase 1                                                                 | Cell membrane<br>Cytoplasm | Sia $\alpha$ 2,3Gal $\beta$ 1,4Glc-ceramide | Glycolipid       | Catalyzes the transfer of sialic acid from CMP-sialic acid to GM3 to produce gangliosides GD3 and GT3                                                                                                   | Not regulated |
| ST8SIA-2                                                                                                                                                                      | ST8 $\alpha$ - <i>N</i> -acetylneuraminidase $\alpha$ -2,8-sialyltransferase 2                                                                 | Cell membrane<br>Cytoplasm | Sia $\alpha$ 2,3Gal $\beta$ 1,4GlcNAc       | <i>N</i> -glycan | Catalyze the transfer of sialic acid from CMP-sialic acid to <i>N</i> -linked oligosaccharides and glycoproteins. The encoded protein may be                                                            | Not regulated |

|          |                                                                              |                            |                                                                 |                                 |                                                                                                                                                                                                   |               |
|----------|------------------------------------------------------------------------------|----------------------------|-----------------------------------------------------------------|---------------------------------|---------------------------------------------------------------------------------------------------------------------------------------------------------------------------------------------------|---------------|
|          |                                                                              |                            |                                                                 |                                 | found in the Golgi apparatus and may be involved in the production of polysialic acid, a modulator of the adhesive properties of neural cell adhesion molecule (NCAM1)                            |               |
| ST8SIA-3 | ST8 $\alpha$ - <i>N</i> -acetylneuraminide $\alpha$ -2,8-sialyltransferase 3 | Cell membrane<br>Cytoplasm | Sia $\alpha$ 2,3Gal $\beta$ 1,4GlcNAc                           | <i>N</i> -glycan                | Forms sialyl- $\alpha$ -2,8-sialyl-R linkages at the nonreducing termini of glycoconjugates                                                                                                       | Not regulated |
| ST8SIA-4 | ST8 $\alpha$ - <i>N</i> -acetylneuraminide $\alpha$ -2,8-sialyltransferase 4 | Cell membrane<br>Cytoplasm | (Sia $\alpha$ 2,8) <sub>n</sub> Sia $\alpha$ 2,3Gal $\beta$ 1-R | <i>N</i> -glycan                | Catalyzes the polycondensation of $\alpha$ -2,8-linked sialic acid required for the synthesis of polysialic acid, a modulator of the adhesive properties of neural cell adhesion molecule (NCAM1) | Not regulated |
| ST8SIA-5 | ST8 $\alpha$ - <i>N</i> -acetylneuraminide $\alpha$ -2,8-sialyltransferase 5 | Cell membrane<br>Cytoplasm | GM1b, GT1b, GD1a, GD3                                           | Glycolipid                      | Involved in the synthesis of gangliosides GD1c, GT1a, GQ1b, and GT3 from GD1a, GT1b, GM1b, and GD3, respectively                                                                                  | Not regulated |
| ST8SIA-6 | ST8 $\alpha$ - <i>N</i> -acetylneuraminide $\alpha$ -2,8-sialyltransferase 6 | Cell membrane<br>Cytoplasm | Sia $\alpha$ 2,3(6)Gal                                          | Sialic acid on <i>O</i> -glycan | Synthesize sialylglycoconjugates                                                                                                                                                                  | Not regulated |

271

272

273 **Supplementary Table S5:** Strains and associated PCR primers used for deletion mutant construction. The deletion mutants that did not change  
 274 infection were not included in the genomic analysis.

| Gene::Strain Name     | Primers used for generation                                                                                                                                  | Notes                                                        |
|-----------------------|--------------------------------------------------------------------------------------------------------------------------------------------------------------|--------------------------------------------------------------|
| <i>Salmonella</i> LT2 | N/A                                                                                                                                                          | Wild-type strain<br>Accession AE006468                       |
| ΔSTM2896::Cm LT2      | 5'-GTCGTACTATTGAAAAGCTGTCTTAATTTAATATTAACAGGATACCTATAGTGTAGGCTGGAGCTGCTTC-3'<br>5'-TAATTCAGCGATATCCAAATGTTGCATAGATCTTTTCCTTAATTAAGCCCATGGGAATTAGCCATGGTCC-3' | ΔinvA, strain is chloramphenicol (Cm) resistant<br>Accession |
| ΔSTM4298::Cm LT2      | 5'-ACCGGGAACGCGTGCCACCATGAAGGTGTTCACTACTGTTCTGGAGAGTCGTGTAGGCTGGAGCTGCTTC-3'<br>5'-TCTGTTAGTAGAGGTTAAACGCCGATCTGCCGTCCAGCGCGGCTGGAGAATGGGAATTAGCCATGGTCC-3'  | Strain is Cm resistant<br>Accession                          |
| ΔSTM1252::Cm LT2      | 5'-TTCATACGTAAAAAGCTGATGCTTTTTACCTTATTTAATCGAGGCAGGTGTGTAGGCTGGAGCTGCTTC-3'<br>5'-CCGGCAAGGCATTATTATTCCAGCGCTATCGGTTTCGACTGATAGCGCCATGGGAATTAGCCATGGTCC-3'   | Strain is Cm resistant<br>Accession                          |
| ΔSTM0928::Cm LT2      | 5'-ACTCTTCTGTGCTACTCGTCACATAAACAGAAATAACGGTAATCATATGTGTGTAGGCTGGAGCTGCTTC-3'<br>5'-TAGAGACTGCTGCTATATGTTATATAGCAGCAATGGCTATTTTTTGATGTATGGGAATTAGCCATGGTCC-3' | Strain is Cm resistant<br>Accession                          |
| ΔSTM3664::Cm LT2      | 5'-CGCCTAAAACAGGCAAGCTGATGAATATTGCCACAAAGGATAGCGTGGTGTAGGCTGGAGCTGCTTC-3'<br>5'-TTTTGTTTTGAAGGGCTACCGGTACGCGAGGAGACCGGTAGCGCCACGAATGGGAATTAGCCATGGTCC-3'     | Strain is Cm resistant<br>Accession                          |
| ΔSTM3537::Cm LT2      | 5'-AACCTGACGTTACCGCCGTTGGCGACGATCTGGCTGATGCGGGAGGGGAGTGTAGGCTGGAGCTGCTTC-3'<br>5'-CAACATTACACGATCGTTCTTCTCTAAACTCACCATGATTAACCTTTTTATGGGAATTAGCCATGGTCC-3'   | Strain is Cm resistant<br>Accession                          |
| ΔSTM3338::Cm LT2      | 5'-GCGGAGCCGCCATTCCGCATAACGACAACAAAATCGTCGGGAGAGTAAAGTGTAGGCTGGAGCTGCTTC-3'<br>5'-ACATACTACTCCCTTACAAATATTGCCCGGTTGAAAACCGGGCAAGCGGAATGGGAATTAGCCATGGTCC-3'  | Strain is Cm resistant                                       |
| ΔSTM3662::Cm LT2      | 5'-GTTTTGATAGTATCCATGAGTCCAGGTTCACTTTTGCAGGATATATCCTCGTGTAGGCTGGAGCTGCTTC-3'<br>5'-CGGATGGCGCTACGCTATCCGGCTTACAAGGCATCTGTAGGCTGGATAAAATGGGAATTAGCCATGGTCC-3' | Strain is Cm resistant                                       |
| ΔSTM3663::Cm LT2      | 5'-TCGTGAAAAATAAAAGGTGTTGGAATGTATCAATCCGACCAGGAGACCTAGTGTAGGCTGGAGCTGCTTC-3'<br>5'-CTACAGATGCCTTGTAAGCCGGATAGCGTAGCGCCATCCGGCACACAGAAATGGGAATTAGCCATGGTCC-3' | Strain is Cm resistant                                       |

275

276

## Supplementary Methods

277

### 278 Cell Culture

279 Colonic epithelial cells (Caco-2; ATCC HTB-37) were obtained from American Type Culture  
280 Collection (Manassas, VA) and grown as per the manufacturer's instructions. Briefly, cells were seeded  
281 to a density of  $10^5$  cells/cm<sup>2</sup> in 96-well plate using culture media comprising of DMEM/High Modified  
282 (Thermo Scientific, Rockford, IL), non-essential amino acids (Thermo Scientific, Rockford, IL), 10mM  
283 MOPS (Sigma, St. Louis, MO), 10 mM TES (Sigma, St. Louis, MO), 15 mM HEPES (Sigma, St. Louis,  
284 MO) and 2 mM NaH<sub>2</sub>PO<sub>4</sub> (Sigma, St. Louis, MO). Additionally, 16.6% fetal bovine serum (FBS)  
285 (HyClone Laboratories, Logan, UT) was added to the cell culture media during maintenance and  
286 propagation between bacterial association assays. Cells were incubated at 37°C with 5% CO<sub>2</sub> to allow  
287 differentiation before use in bacterial association assays<sup>3,4</sup>.

288

### 289 Gene Deletion

290 Bacterial gene deletions were done as described by Datsenko and Wanner<sup>5</sup>. Deletion strains  
291 were generated using the lambda-red recombinase method as described. A mini-prep kit (Qiagen,  
292 Valencia, CA) was used to isolate plasmid pKD46 containing ampicillin resistance and  $\lambda$  Red  
293 recombinase genes, from *E. coli* BW25141 (CGSC 7634) and plasmid pKD3 carrying chloramphenicol  
294 resistance gene, from *E. coli* BW25141 (CGSC 7631). This plasmid pKD46 was electroporated into the  
295 parent (*Salmonella* WT). Transformants were selected on LB agar containing 100  $\mu$ g/ml ampicillin  
296 (Sigma, St. Louis, MO). The parent strain containing pKD46 was grown in LB broth in the presence of  
297 100  $\mu$ g/ml ampicillin and 100 mM L-arabinose to induce  $\lambda$  Red recombinase production. Plasmid pKD3  
298 (CmR) was used as a template to generate PCR products for deletion of each gene of interest. The  
299 primers used are shown in Supplementary Table S9. The purified PCR products were used for

300 transformation by electroporation (Bio-Rad Gene Pulser) of electrocompetent *Salmonella* WT with  
301 induced  $\lambda$  Red recombinase. The transformants were selected on LB agar with 10  $\mu$ g/ml  
302 chloramphenicol. The gene deletion/interruption was confirmed using PCR for each junction site created  
303 by the insertion.

304

### 305 **Bacterial Association Measurements**

306 *Invaded Salmonella determination.* To enumerate invaded bacteria, cells were incubated with  
307 200  $\mu$ l of 100  $\mu$ g/ml gentamicin for 2 h at 37°C with 5% CO<sub>2</sub>. Host cells incubated with cell culture  
308 media (without gentamicin) were used to enumerate total host associated bacteria. Cells were again  
309 washed once with 200  $\mu$ l 1X PBS buffer and lysed with 50  $\mu$ l of Warnex lysis buffer.

310 Quantitative bacterial analysis was done using qPCR with a CFX 96 Real Time System (BioRad,  
311 Hercules, CA). Reactions were done using SYBR Green Supermix (BioRad) as per manufacturer's  
312 instructions. 100 nM of forward (F) and reverse (R) PCR primers for EF-TU gene (F: 5'- ACG CGG  
313 TAT CAT CAA AGT GG - 3'; R: 5' - ATC GGG TGG ATC AGG GTA AC - 3') to quantify  
314 *Salmonella* WT and GAPDH gene (F: 5'- ACC ACA GTC CAT GCC ATC AC - 3'; R: 5'-TCC ACC  
315 ACC CTG TTG CTG TA -3') to quantify Caco-2 cells (Integrated DNA technologies, Coralville, IA)  
316 were used. The parameters for both primers was done using a denaturation step at 95°C for 5 min,  
317 followed by 40 cycles of denaturation, annealing, and extension at 95°C for 15 s, 56°C for 30 s, 72°C for  
318 30 s, respectively, and a final extension at 72°C for 1 min. The amplified product was verified using  
319 melt curve analysis from 50°C to 95°C with a transition rate of 0.2°C/s.

320

### 321 **Glycan Degradation**

322           *Cell membrane extraction.* The cell pellets were suspended in 20 mM homogenized buffer  
323 containing 0.25 M sucrose, 20 mM HEPES-KOH (pH 7.4), and a protease inhibitor. Cells were lysed on  
324 ice using a sonicator (Qsonica, CT) and cell lysates were centrifuged at 2,000 x g for 10 min to remove  
325 the nuclear fraction and debris. The supernatant was collected and brought to 1 mL with homogenized  
326 buffer for ultracentrifugation at 60,000 rpm for 45 min at 4°C. The pellet was suspended in 0.2 M  
327 Na<sub>2</sub>CO<sub>3</sub> (pH 11) and pelleted by ultracentrifugation to fragment the endoplasmic reticulum. Finally, to  
328 remove the cytoplasmic fraction, the pellet was washed with water followed by ultracentrifugation. The  
329 resulting membrane pellet was isolated and stored at -20°C until further processing.

330           *Enzymatic Release of N-Glycans.* Membrane pellets were suspended with 100 µL of 100 mM  
331 NH<sub>4</sub>HCO<sub>3</sub> in 5 mM dithiothreitol and heated for 10 s at 100°C to thermally denature the proteins. To  
332 release the glycans, 2 µL of peptide N-glycosidase F (New England Biolabs, MA) were added to the  
333 samples and incubated at 60°C in a microwave reactor (CEM Corporation, NC) for 10 minutes at 20  
334 watts. After addition of 400 µL of ice-cold ethanol, the samples were frozen for 1 hour at -80°C to  
335 precipitate residual deglycosylated proteins and centrifuged for 30 minutes at 15,000 rpm. The  
336 supernatant containing the N-glycans was collected and dried.

337           *N-Glycan Enrichment.* Released N-glycans were purified by solid-phased extraction containing a  
338 porous graphitized carbon (PGC) matrix. PGC cartridges were conditioned with nanopure water  
339 followed by 80% ACN in 0.05% TFA (v/v) solution and again with nanopure water. Glycan samples  
340 were loaded onto the cartridge and washed with nanopure water at a flow rate of 1 mL/min to remove  
341 salts and buffer. N-glycans were eluted with a solution of 40% ACN in 0.05% TFA (v/v) and dried.

342           *Nano-LC-MS and LC-MS/MS Analysis.* Samples were reconstituted in 15 µL of nanopure water  
343 and analyzed using an Agilent HPLC-Chip-QTOF MS (Agilent, CA). The microfluidic nanospray chip  
344 is connected to the microwell plate sampler and consists of an enrichment column and LC analytical

345 column packed with porous graphitized carbon. For each sample, 8  $\mu\text{L}$  was injected onto the enrichment  
346 column and separated with a binary gradient: (A) 3% ACN and 0.1% formic acid (v/v) in water and (B)  
347 90% ACN in 1% formic acid (v/v). The column was eluted at 0.3  $\mu\text{L}/\text{min}$  for the nanopump and 4  
348  $\mu\text{L}/\text{min}$  for the capillary pump. The 32-min gradient was programmed with the following proportions  
349 and time points: 5% to 32.8% B from 0 min to 13.3 min; 32.8% to 35.9% B from 13.3 min to 16.5 min;  
350 35.9% to 100% B from 16.5 to 21.5 at 0.8  $\mu\text{L}/\text{min}$  to flush out non-glycan compounds; 100% to 0%  
351 from 21.5 to 32 min at 8  $\mu\text{L}/\text{min}$  to re-equilibrate the column before the next injection. The drying gas, 2  
352 L of filtered nitrogen gas and 2 L of filtered dry compressed air, was set to a temperature of 325°C and a  
353 flow rate of 4 L/min. MS spectra were acquired in positive ionization mode at an acquisition time of 1.5  
354 s per spectrum over a mass range of  $m/z$  500-2000. Mass discrimination inaccuracies were corrected  
355 with reference masses of  $m/z$  622.029, 922.010, 1221.991, and 1521.971.

356 Collision-induced dissociation (CID) was performed with nitrogen gas using a series of collision  
357 energies ( $V_{\text{collision}}$ ) dependent on the  $m/z$  values of the *N*-glycans, based on the equation:  $V_{\text{collision}} = \text{slope}$   
358  $(m/z) + \text{offset}$ , where the slope and offset were set at (1.8/100 Da) V and -2.4 V, respectively.

359 *N*-Glycan compositions were identified with an in-house retrosynthetic library according to  
360 accurate mass<sup>1</sup>. Signals above a signal-to-noise ratio of 5.0 were filtered and deconvoluted using  
361 MassHunter Qualitative Analysis B.03.01 (Agilent Technologies, CA). Deconvoluted masses were  
362 compared to theoretical masses using a mass tolerance of 20 ppm and a false discovery rate of 0.6%.  
363 Relative abundances were determined by integrating the peak areas for observed glycan masses and  
364 normalizing to the summed peak areas of all glycans detected.

365

366 **Phylogenetic analysis of sialidases**

367 Sialidase sequence searches in NCBI using Geneious were used to identify homologues of *nanH*  
368 (1900 amino acid sequences) and *CHPNeu* (1100 amino acid sequences). Amino acid sequences were  
369 aligned with Geneious Alignment with default parameters<sup>6,7</sup>. The multiple sequence analysis (MSA)  
370 were used to build phylogenetic trees using Geneious Tree Builder with Jukes-Cantor genetic distance  
371 model using Neighbor-Joining method with 1000 bootstrap replcations.

372

### 373 **Supplementary References**

374 1 Kronewitter, S. R. *et al.* The development of retrosynthetic glycan libraries to profile and  
375 classify the human serum N-linked glycome. *Proteomics* **9**, 2986-2994,  
376 doi:10.1002/pmic.200800760 (2009).

377 2 Crespo, H. J., Lau, J. T. & Videira, P. A. Dendritic cells: a spot on sialic Acid. *Frontiers in*  
378 *immunology* **4**, 491, doi:10.3389/fimmu.2013.00491 (2013).

379 3 Ferruzza, S., Rossi, C., Scarino, M. L. & Sambuy, Y. A protocol for differentiation of human  
380 intestinal Caco-2 cells in asymmetric serum-containing medium. *Toxicology in vitro : an*  
381 *international journal published in association with BIBRA* **26**, 1252-1255,  
382 doi:10.1016/j.tiv.2012.01.008 (2012).

383 4 Sambuy, Y. *et al.* The Caco-2 cell line as a model of the intestinal barrier: influence of cell and  
384 culture-related factors on Caco-2 cell functional characteristics. *Cell biology and toxicology* **21**,  
385 1-26, doi:10.1007/s10565-005-0085-6 (2005).

386 5 Datsenko, K. A. & Wanner, B. L. One-step inactivation of chromosomal genes in *Escherichia*  
387 *coli* K-12 using PCR products. *Proceedings of the National Academy of Sciences of the United*  
388 *States of America* **97**, 6640-6645, doi:10.1073/pnas.120163297 (2000).



389 6 Edgar, R. C. MUSCLE: multiple sequence alignment with high accuracy and high throughput.  
390 *Nucleic acids research* **32**, 1792-1797, doi:10.1093/nar/gkh340 (2004).

391 7 Kearse, M. *et al.* Geneious Basic: an integrated and extendable desktop software platform for the  
392 organization and analysis of sequence data. *Bioinformatics* **28**, 1647-1649,  
393 doi:10.1093/bioinformatics/bts199 (2012).

394
